1           **The biogenesis of extracellular vesicles from *Staphylococcus aureus* and their**  
2                               **application as a novel vaccine platform**

3

4

5

6                               Xiaogang Wang<sup>1</sup>, Christopher Weidenmaier<sup>2,3</sup>, and Jean C. Lee<sup>1</sup>

7

8

9

10       <sup>1</sup>Division of Infectious Diseases, Department of Medicine, Brigham and Women's Hospital and  
11       Harvard Medical School, Boston, MA, and <sup>2</sup>Interfaculty Institute for Microbiology and Infection  
12       Medicine, University of Tuebingen, and <sup>3</sup>German Center for Infection Research, Partner Site  
13       Tuebingen, Germany

14

15

16

17

18

19       Running title: *S. aureus* extracellular vesicles

20

21

22

23       Correspondence to: Jean C. Lee, Ph.D., 181 Longwood Avenue, Boston, MA 02115 Phone:  
24       617 525 2562

25

26

27

28       Key Words: *Staphylococcus aureus*, extracellular vesicles, cross-linked peptidoglycan,  
29       autolysins, phenol-soluble modulins, vaccine, mouse sepsis model

30

31 **Abstract**

32 Gram-positive bacteria secrete extracellular vesicles (EVs) that package diverse bacterial  
33 antigens and play key roles in bacterial pathogenesis. However, the mechanisms underlying EV  
34 production in Gram-positive bacteria are poorly understood. We purified and characterized EVs  
35 from a community-associated methicillin-resistant *Staphylococcus aureus* isolate (USA300) and  
36 investigated mechanisms underlying EV production. Native EVs contained 165 proteins, including  
37 cytosolic, surface, and secreted proteins, autolysins, and numerous cytolysins. Staphylococcal  
38 alpha-type phenol-soluble modulins (surfactant-like peptides) promoted EV biogenesis,  
39 presumably by acting at the cytoplasmic membrane, whereas peptidoglycan crosslinking and  
40 autolysin activity were found to increase EV production by altering the permeability of the  
41 staphylococcal cell wall. To address the immunogenicity of EVs, we created engineered EVs  
42 (eng-EVs) by expressing detoxified proteins Hla<sub>H35L</sub> and LukE in EVs generated from a nontoxic  
43 *S. aureus*  $\Delta agr\Delta spa$  mutant. Eng-EVs exhibited no cytotoxicity in vitro, and mice immunized with  
44 the eng-EVs produced toxin-neutralizing antibodies and showed reduced lethality in a mouse  
45 sepsis model. Our study reveals novel mechanisms underlying *S. aureus* EV production and  
46 highlights the usefulness of EVs as a novel *S. aureus* vaccine platform.

47

## 48 **Introduction**

49 *Staphylococcus aureus* is a pathogenic bacterium that causes a wide range of human infections,  
50 ranging from mild skin lesions to more invasive and life-threatening infections, such as bacteremia,  
51 endocarditis, wound infections, and pneumonia. The pathogenesis of *S. aureus* infections is  
52 generally attributed to a wide array of virulence determinants including surface proteins<sup>1</sup> and  
53 glycopolymers<sup>2</sup>, as well as multiple secreted proteins, such as cytolysins, superantigens,  
54 leukotoxins, hemolysins, and proteases<sup>3</sup>. Although several specific export pathways have been  
55 described in *S. aureus*, the secretome often includes proteins that lack export signals and have  
56 typical cytoplasmic functions. The mechanisms by which cytoplasmic proteins are excreted by  
57 *S. aureus* has attracted recent interest<sup>4, 5</sup>, and there is increasing evidence that these proteins  
58 may be secreted within membrane vesicles<sup>6-9</sup>.

59 Secretion of extracellular vesicles (EVs) is a process common to eukaryotes, archae, and  
60 bacteria<sup>10</sup>. EVs are nano-sized, spherical, bilayered membrane vesicles with a cargo that includes  
61 diverse proteins, polysaccharides, nucleic acids, and lipids. EV formation by Gram-negative  
62 bacteria was first observed by electron microscopy in the 1960s<sup>11,12</sup>, and these bacteria secrete  
63 what are now referred to as outer membrane vesicles (OMVs). The generation of OMVs appears  
64 to occur by phospholipid accumulation in the outer leaflet of the outer membrane, followed by the  
65 formation of outer membrane protrusions that pinch off to form vesicles<sup>13</sup>. OMVs likely play  
66 important roles in bacterial pathogenesis due to packaging of multiple virulence factors<sup>14</sup>, and the  
67 ability of OMVs to serve as immune modulators by inducing innate and adaptive immune  
68 responses<sup>15</sup>.

69 More recent work has described the production and release of extracellular vesicles (EVs)  
70 from Gram positive bacteria, such as *S. aureus*<sup>16,17</sup>, *Streptococcus pneumoniae*<sup>7</sup>, and *Bacillus*  
71 *anthracis*<sup>6</sup>. Only actively metabolizing bacteria generate EVs, and EVs are not released by killed  
72 cells<sup>9</sup>. Due to the presence of a thick peptidoglycan (PGN) structure surrounding the bacterial  
73 cell, the extracellular release of EVs from Gram positive microbes is a complex process that is

74 poorly understood. That EVs from Gram positive organisms also play important roles in host-  
75 parasite interactions is supported by reports that EVs may contain biologically active toxins,  
76 exhibit cytotoxicity, and elicit pro-inflammatory mediators<sup>9</sup>. Additional findings indicate that EVs  
77 positive for *S. aureus* toxins elicit skin barrier disruption in mice with characteristic atopic  
78 dermatitis-like skin inflammation<sup>18-20</sup>, highlighting their potential contribution to *S. aureus*  
79 disease. However, the toxicity of staphylococcal EVs has until now hampered a relevant study  
80 of their immunogenicity and potential use as a novel vaccine platform.

81       Development of bacteria-derived vesicles as a multivalent vaccine platform is feasible  
82 since vesicles package an array of different antigens including those that are cytosolic,  
83 membrane-associated, secreted, and surface exposed. A vaccine containing *Neisseria*  
84 *meningitidis* recombinant proteins combined with group B OMVs was licensed to protect humans  
85 against meningococcal B disease in the U.S. and other countries<sup>21</sup>, attesting to the efficacy of this  
86 vaccine platform. Additionally, a growing number of studies involving the use of OMVs as vaccines  
87 against bacterial pathogens have shown protection in experimental infection models<sup>22-25</sup>.

88       Despite repeated efforts to develop experimental vaccines and immunotherapeutics  
89 against *S. aureus*, neither have proven effective in preventing staphylococcal infections in  
90 humans<sup>26</sup>. Mice immunized with native EVs from *S. aureus* ATCC 14458 responded with a robust  
91 T cell response and were protected against staphylococcal lung infections, although the cytolytic  
92 activity of EVs prepared from wild type (WT) *S. aureus* was not addressed in this study<sup>27</sup>. Similarly,  
93 EVs isolated from *S. pneumoniae* protected mice against lethal pneumonia<sup>7</sup>. Despite the  
94 documented immunogenicity and protective efficacy of bacterial EV-based vaccines, EV  
95 preparations derived from some bacterial pathogens may contain toxins or other virulence factors  
96 that potentially damage host cells<sup>17,28-31</sup>. The development of EVs as a vaccine platform will  
97 require a more thorough characterization of the mechanisms of EV biogenesis to allow for  
98 consistent production with adequate quality assurance.

99 In the present study, we generated, purified, and characterized EVs isolated from  
100 *S. aureus* USA300, a predominant CA-MRSA clone in United States, and investigated the  
101 biogenesis of EV formation. Our study reveals distinct mechanisms that facilitate EV production  
102 at multiple stages. Phenol soluble modulins (PSMs) act at the membrane level to facilitate vesicle  
103 budding at the cytoplasmic membrane, whereas cell wall porosity is modulated by PGN cross-  
104 linking and production of autolysins. We investigated the cytotoxicity and immunogenicity of  
105 staphylococcal EVs and explored their usefulness as a novel vaccine platform. By genetically  
106 engineering a nontoxic mutant *S. aureus* strain to over-produce detoxified alpha hemolysin  
107 (Hla<sub>H35L</sub>) and a leukocidin monomer (LukE), we created engineered EVs (eng-EVs) that were  
108 immunogenic, nontoxic, and protected against *S. aureus* lethal sepsis in mice. Our investigations  
109 will not only further the development of this novel vaccine platform, but also promote further  
110 studies of the impact of EVs on the pathogenicity of *S. aureus* and other Gram-positive pathogens.

111

## 112 **Results**

113 **Isolation of EVs from *S. aureus* USA300 strain JE2.** EV formation by at least 10 different  
114 *S. aureus* strains has been reported<sup>16,17,28,32</sup>, and EV shedding is likely common to many clinical  
115 isolates. We isolated and characterized EVs from USA300 strain JE2, representing the major  
116 clone associated with CA-MRSA disease in the U.S.<sup>33</sup>. JE2 culture supernatants were filtered,  
117 concentrated to remove molecules <100 kDa, and ultracentrifuged to pellet the EVs (Fig. 1a). To  
118 remove non-membranous proteins, protein aggregates, and denatured EVs, a 10-40% Optiprep-  
119 based density gradient centrifugation step was performed on the crude EV preparations.  
120 Consecutive (top to bottom) Optiprep fractions (10  $\mu$ l) were subjected to SDS-PAGE. As shown  
121 in Fig. 1b, little silver-stained material was recovered from fractions 1 and 2. Samples with similar  
122 protein banding patterns (fractions 3-8 and 9-11) were pooled, diafiltered to remove the Optiprep  
123 medium, and examined by TEM. Notably, EVs were only observed in the pooled sample from

124 fractions 3-8 (Fig. 1c), but not from fractions 9-11 (Fig. 1d). These results indicated that EVs are  
125 produced by USA300 strain and were mainly distributed in fractions containing 20%-35% Optiprep.

126

127 **Identification of EV-associated proteins by liquid chromatography-tandem mass**  
128 **spectrometry (LC-MS/MS).** To identify the proteins comprising EVs from *S. aureus* JE2, we  
129 performed a proteomic analysis of Optiprep-purified EVs using LC-MS/MS. A total of 165 proteins  
130 were identified in JE2 EVs (Table S1), including many proteins that are characterized as virulence  
131 factors, such as alpha toxin (Hla), leukocidin subunits (LukS-PV, LukF-PV, LukE, LukD, HlgB,  
132 and HlgC), surface adhesins (ClfA, ClfB, SdrD, SdrE, Efb, and Ebh), MntC, proteases, and  
133 immune evasion factors (Sbi, phenol soluble modulins, catalase, CHIPS, and SodA). Other  
134 proteins of interest included penicillin binding proteins, autolysins (Atl, Sle and other putative  
135 autolysins predicted to have N-acetylmuramoyl-L-alanine amidase activity), and multiple proteins  
136 involved in iron acquisition. A number of lipoproteins with and without characterized functions  
137 were also identified in JE2 EVs. Bioinformatic analyses revealed that 76 cytoplasmic proteins  
138 were enriched in *S. aureus* EVs, and these represented 46% of all EV proteins. Cell wall  
139 associated proteins (n=16), extracellular proteins (n=27), membrane proteins (n=19), and proteins  
140 with an unknown localization (n=27) accounted for 10%, 16%, 12%, 16% of total proteins,  
141 respectively.

142 **PSM peptides are involved in the generation of *S. aureus* EVs.** The mechanisms underlying  
143 EV production by *S. aureus* and other Gram-positive bacteria remain unclear. PSMs are a family  
144 of amphipathic, alpha-helical, surfactant-like peptides secreted by *S. aureus*, which are  
145 proinflammatory and show cytolytic activity against neutrophils<sup>34,35</sup>. Alpha-type PSMs are required  
146 for mobilizing lipoproteins from the staphylococcal cytoplasmic membrane, a process essential  
147 for activating TLR2<sup>36</sup>, as well as the export of cytoplasmic proteins, consistent with the membrane-

148 damaging activity of PSMs<sup>5</sup>. Because the cargo of *S. aureus* EVs is enriched for both lipoproteins  
149 and cytoplasmic proteins, we evaluated whether PSM peptides were critical for EV generation.

150 We measured EV production by the WT USA300 LAC strain (the parent strain of JE2), as  
151 well as LAC  $\Delta psma$ ,  $\Delta psm\beta$ , and  $\Delta psma\Delta psm\beta$  mutants<sup>34</sup>. First, we evaluated EV production by  
152 dot immunoblot analysis with detection by serum from mice immunized with WT JE2 EVs. Only  
153 mutation of *psma* genes showed a reduced signal in immunoblotting assay for EV production (Fig.  
154 2a). To further substantiate our result, we measured EV yield and particle number by assays for  
155 protein content and nanoparticle tracking, respectively. Consistently, mutation of the *psma* genes  
156 significantly reduced *S. aureus* EV yield (Fig. 2b) and particle number (Fig. 2c). The  $\Delta psma$  and  
157  $\Delta psma\Delta psm\beta$  double mutant produced comparable levels of EVs when tested with EV yield  
158 analysis (Fig. 2b), indicating that PSM $\alpha$  peptides play the dominant role in this phenotype.  
159 Complementation with p $\Delta$ TX expressing PSM $\alpha$ 1-4 genes, but not the p $\Delta$ TX vector alone, restored  
160 EV production to the  $\Delta psma$  mutant (Figs. 2b and 2c). Mutation of the *psma* genes significantly  
161 reduced *S. aureus* EV size (Fig. 2c and 2d), whereas the  $\Delta psm\beta$  mutant produced EVs of  
162 intermediate size compared to that of WT LAC.

163 **PGN cross-linking modulates EVs production.** Unlike OMVs produced by Gram-negative  
164 microbes, *S. aureus* cytoplasmic membrane-derived EVs must traverse a PGN cell wall structure  
165 before cellular release. To determine whether the degree of PGN crosslinking affected *S. aureus*  
166 EV biogenesis, we cultured *S. aureus* JE2 in medium with a sublethal concentration (0.2  $\mu$ g/ml)  
167 of penicillin G (PenG) that has been shown to decrease PGN cross-linking<sup>37</sup>. Treatment with a  
168 sublethal concentration (0.1  $\mu$ g/ml) of Em served as antibiotic control that has no effect on PGN  
169 cross-linking. Compared to EVs recovered from untreated cultures or cultures incubated with Em,  
170 the EV yield from PenG-treated cultures was distinctly higher (Fig. 3a). When the EV protein  
171 content was quantified from a fixed volume of culture left untreated or treated with sublethal

172 antibiotic concentrations, we observed a 10-fold increase in EV yield from PenG-treated cultures  
173 (Fig. 3b).

174 *S. aureus* penicillin binding protein 4 (PBP4) is a carboxypeptidase that is essential for  
175 secondary crosslinking of PGN, and a *pbp4* mutant shows a significant reduction in PGN  
176 crosslinking<sup>37,38</sup>. As predicted, both dot blot (Fig. 3c) and EV protein yield assays (Fig. 3d) showed  
177 increased EV production by JE2 $\Delta$ *pbp4*, and the protein yield was 3-fold higher than the wild-type  
178 JE2 strain. We also measured EV production in MRSA isolates MW2, COL, and their  $\Delta$ *pbp4*  
179 mutants; the relative increase in EV yield in the mutant strains (Fig. 3c and 3d) was consistent  
180 with that of JE2 $\Delta$ *pbp4*.

181 WTA is a PGN-anchored glycopolymer that is major component of the *S. aureus* cell wall  
182 and plays a critical role in cell wall homeostasis<sup>2</sup>. The *tagO* gene encodes an *N*-acetyl  
183 glucosamine-phosphate transferase enzyme that catalyzes the first step in WTA biosynthesis<sup>39,40</sup>,  
184 and deletion of *tagO* gene abrogates *S. aureus* WTA production<sup>41</sup>. Compared to the WT strains  
185 JE2, COL, and Newman, *tagO* mutants showed an enhanced signal in the dot immunoblot assay  
186 for EV production (Fig. 3e). Likewise, quantitative analysis of EV protein yield showed that all  
187 three *tagO* mutants produced significantly more EVs than the parental isolates (Fig. 3f). Thus,  
188 WTAs negatively modulate *S. aureus* EV production, consistent with reports showing that *tagO*  
189 mutants are characterized by diminished PGN cross-linking<sup>42</sup>. The WTA backbone is decorated  
190 with ester-linked D-ala residues, which confer a zwitterionic charge to the polymer<sup>2,43</sup>. As shown  
191 in panels e and f of Fig. 3, production and yield of EVs by the  $\Delta$ *dltA* mutant were similar to that of  
192 the parental strain Newman.

193 To determine whether EV size was affected by reduced PGN crosslinking, the size  
194 distribution of purified EVs was measured by dynamic light scattering (DSL). Treatment of JE2  
195 cultures with 0.2  $\mu$ g/ml PenG or mutation of *pbp4* or *tagO* resulted in a significant increase in the



196 size distribution of EVs (Fig. 3g), as well as an increased EV average size (Fig. 3h) compared to  
197 untreated WT EVs. Because enhanced EV production and yield associated with reduced PGN  
198 crosslinking might be a result of larger EVs that would carry an increased cargo load, we  
199 quantified EVs by nanoparticle tracking analysis. As shown in Fig. 3i, treatment of JE2 cultures  
200 with 0.2  $\mu\text{g/ml}$  PenG or mutation of *pbp4* or *tagO* resulted in suspensions containing significantly  
201 greater numbers of EV particles per ml compared to untreated WT EVs. Taken together, our data  
202 indicate that *S. aureus* EV production is inversely proportional to the degree of PGN crosslinking.

203 **Autolysin Sle1 modulates the release of EVs.** Atl and Sle1 belong to a family of PGN  
204 hydrolases that plays a critical role in separation of daughter cells<sup>44,45</sup>. In addition, Atl has been  
205 shown to modulate the excretion of a subset of staphylococcal cytoplasmic proteins<sup>4</sup>. The  
206 staphylococcal autolysins Atl and Sle1 are abundant proteins in JE2 EVs (Table S1), as well as  
207 in *S. aureus* EV preparations characterized previously<sup>16</sup>.

208 To determine whether PGN-hydrolases facilitate the release of EVs by altering the thick cell  
209 wall of Gram positive bacteria, we compared EV production from *atl* and *sle1* mutants with that of  
210 strains JE2 and Newman. Although both mutants showed reduced EV production (Fig. 4a), the  
211 reduction in yield was only significant in the *sle1* mutants (Fig. 4b). Similar results were obtained  
212 by nanoparticle tracking analysis wherein EV purification from the *sle1* mutant, but not the *atl*  
213 mutant, yielded a significantly lower EV concentration compared with that of the WT strain JE2  
214 (Fig. 4c). To determine whether autolysin activity affected the size distribution of EVs, we  
215 evaluated purified EVs by dynamic light scattering. As shown in Fig. 4d and 4e, both *atl* and *sle1*  
216 mutations exhibited a reduced EV size compared to WT JE2 EVs.

217 **The influence of capsular polysaccharide (CP) on *S. aureus* EV production.** Streptococcal  
218 CP production was shown to hinder EV release by *Streptococcus pneumoniae*<sup>7</sup> but not  
219 *S. pyogenes*<sup>8</sup>. To determine whether the presence of *S. aureus* CP impacted EV biogenesis, we

220 evaluated EV production by a number of isogenic CP+ and CP- strains. The EV pellet was derived  
221 by ultracentrifugation of filter-sterilized culture supernatants and would not contain soluble CP. As  
222 shown in Fig. 5a, the CP phenotype had no obvious impact on the EV dot blot signal derived from  
223 WT or CP- mutants of strains Newman or 6850. Similarly, when we complemented the genetic  
224 defect in the *cap5* locus of USA300 strain 923 with pCap17, the strain produced CP5<sup>46,47</sup>, but  
225 there was no effect on the EV signal levels achieved by dot blotting (Fig. 5a). Likewise, CP+ and  
226 isogenic CP- strains of Newman, 6850, and 923 produced comparable protein yields of EVs (Fig.  
227 5b). Thus, *S. aureus* CP did not influence the yield or block the release of EVs from *S. aureus*  
228 Newman (CP5+), 6850 (CP8+), or a CP5+ USA300 isolate.

229 To investigate whether CP antigens were associated with *S. aureus* EVs, we performed CP  
230 immunoblots on EVs prepared from strains Newman (CP5+), MN8 (CP8+), and USA300  
231 FPR3757 (CP-). We tested both intact and sonicated EVs since CP antibodies would react with  
232 surface-associated CP antigens on intact EVs, whereas intravesicular CP antigens would only be  
233 detected in sonicated EV preparations. Figure 5c shows that CP5 was only detected in sonicated,  
234 but not intact Newman EVs, whereas CP8 was detected in both intact and sonicated MN8 EVs.  
235 Because WT FPR3757 produces no CP, EVs from this strain reacted with neither CP antibody.  
236 These data indicate both CP5 and CP8 were associated with EVs produced by CP+ *S. aureus*  
237 isolates, although only CP8 was surface exposed. Additional studies outside the scope of this  
238 report are needed to confirm and evaluate the prevalence, significance, and mechanism by which  
239 CP is surface exposed on EVs prepared from a variety of *S. aureus* isolates.

240 **Detoxified EVs secreted by a *S. aureus* mutant are immunogenic and represent a novel**  
241 **multicomponent vaccine platform.** JE2 EVs packaged multiple antigens including lipoproteins,  
242 cytolytic toxins, surface proteins, and enzymes (Table S1). Thus, JE2 EVs could serve as a  
243 multivalent *S. aureus* vaccine candidate if the toxicity of the EVs were eliminated. We detoxified  
244 *S. aureus* EVs by genetically repressing the expression of cytolytic toxins by mutation of *agr*, an

245 *S. aureus* global regulator. We subsequently deleted *spa* (the gene encoding protein A) in the EV  
246 host strain since an *agr* mutant overexpresses Spa, which binds to the Fc $\gamma$  domain of  
247 immunoglobulin and dampens antibody development by cross-linking the Fab domain of V<sub>H</sub>3-type  
248 B cell receptors, resulting in apoptotic collapse of these cells<sup>48</sup>. The JE2 $\Delta$ *agr* $\Delta$ *spa* double mutant  
249 served as our *S. aureus* EV vaccine producing host strain. Consistent with previous reports, we  
250 demonstrated that the JE2 *agr* mutation significantly inhibited mRNA expression of *hla* and the  
251 genes encoding all nine leukocidin subunits (Fig. S1a). EVs from WT JE2, but not the  
252 JE2 $\Delta$ *agr* $\Delta$ *spa* mutant, contained native Hla as assessed by western blotting (Fig. S1b). Similarly,  
253 by using an antibody reactive with both LukS-PV and LukE subunits, we showed that only EVs  
254 from WT JE2 had detectable leukocidin reactivity (Fig. S1b). To further validate our results, we  
255 analyzed the protein content of EVs purified from JE2 $\Delta$ *agr* $\Delta$ *spa* by MS. Notably, many of the  
256 extracellular proteins that were present in JE2 WT EVs were not detectable in EVs from  
257 JE2 $\Delta$ *agr* $\Delta$ *spa*. However, some antigens such as MntC and FhuD2 that have been shown to  
258 protect mice against experimental *S. aureus* infections<sup>49-52</sup> were still present in EVs from the  
259 mutant strain. Neither protein A nor the cytotoxins Hla, Luk-PVL, LukED, HlgCB, SeIX, and PSMs  
260 were detectable by LC-MS/MS in EVs purified from the JE2 $\Delta$ *agr* $\Delta$ *spa* mutant (Table S2). Although  
261 LukAB was still present in EVs from JE2 $\Delta$ *agr* $\Delta$ *spa*, there was  $\geq$ 86% reduction in the number of  
262 peptides detected in the mutant strain (Table S1 and Table S2). Moreover, as indicated below,  
263 EVs recovered from the mutant strain showed no residual toxicity toward human leukocytes.

264 To investigate whether the detoxified JE2 EVs were immunogenic and protective against  
265 infection, we immunized mice with 5  $\mu$ g EVs from JE2 $\Delta$ *agr* or JE2 $\Delta$ *agr* $\Delta$ *spa* mutants; control mice  
266 were given PBS. EVs from either mutant elicited a serum antibody response against sonicated  
267 WT EVs, although the antibody level elicited by  $\Delta$ *agr* EVs was higher than that elicited by  
268  $\Delta$ *agr* $\Delta$ *spa* EVs (Fig. S2a). To examine the antigen profiles from EVs that elicited antibody  
269 responses after immunization, a bacterial lysate from the USA300 FPR3757 strain was subjected  
270 to SDS-PAGE and immunoblotted with pooled sera from mice immunized with either  $\Delta$ *agr* EVs or

271  $\Delta agr\Delta spa$  EVs. Notably, sera from  $\Delta agr\Delta spa$  EVs-immunized mice reacted with more bacterial  
272 antigens than sera from  $\Delta agr$  EVs-immunized mice (Fig. S2b), suggesting that  $\Delta agr\Delta spa$  EVs  
273 elicited a greater diversity of antibodies than  $\Delta agr$  EVs. To further evaluate the protective efficacy  
274 of EVs, the immunized mice were challenged with WT USA300 strain FPR3757. Immunization of  
275 mice with EVs from JE2 $\Delta agr\Delta spa$ , but not EVs from JE2 $\Delta agr$ , provided significant protection  
276 against lethal sepsis (Fig. S2c). Preliminary studies indicated that immunization with higher doses  
277 of EVs mixed with alum did not enhance immunogenicity (Fig. S2d).

278 ***S. aureus* engineered EVs (eng-EVs) elicit neutralizing antibodies and protect against**  
279 **lethal sepsis.** An ideal multicomponent *S. aureus* vaccine should elicit cytotoxin neutralizing  
280 antibodies. Hla is a major secreted staphylococcal cytotoxin, and its production has been  
281 associated with severe infections caused by community-acquired MRSA<sup>53</sup>. Immunization  
282 against a nonpore-forming Hla variant (Hla<sub>H35L</sub>) prevents experimental *S. aureus* pneumonia,  
283 skin abscesses, and lethal peritonitis<sup>54-56</sup>. To enhance the protective efficacy of detoxified EVs  
284 from JE2 $\Delta agr\Delta spa$ , we engineered JE2 to package nontoxic Hla<sub>H35L</sub><sup>57</sup> and the LukE monomer  
285 within eng-EVs. LukED is a member of the *S. aureus* family of bicomponent leukotoxins and is  
286 detected in 82% of blood isolates and 61% of nasal isolates<sup>58</sup>. LukED targets both human and  
287 murine neutrophils, macrophages, T cells, dendritic cells, NK cells, and erythrocytes<sup>59,60</sup>.

288 We expressed nontoxic Hla<sub>H35L</sub> and LukE in strain JE2 $\Delta agr\Delta spa$  under control of the *spa*  
289 promoter. Because the activity of the *spa* promoter is enhanced in an  $\Delta agr$  genetic background,  
290 the mRNA levels of Hla<sub>H35L</sub> and LukE expressed in JE2 $\Delta agr\Delta spa$  were dramatically increased  
291 compared to expression in JE2 $\Delta agr\Delta spa$  or JE2 $\Delta agr\Delta spa$  with the empty vector (Fig. S1c). As  
292 predicted, both Hla<sub>H35L</sub> and LukE were detected by Western blot in engineered EVs (eng-EVs)  
293 isolated from recombinant strain JE2 $\Delta agr\Delta spa$  (pHla<sub>H35L</sub>-LukE) (Fig. S1b).

294 To evaluate the relative toxicity of EVs prepared from WT strain JE2 and JE2 $\Delta agr\Delta spa$  vs.  
295 eng-EVs from JE2 $\Delta agr\Delta spa$  (pHla<sub>H35L</sub>-LukE), we incubated the EVs in vitro with three different

296 cell types. A549 cells are susceptible to Hla-mediated cytolysis, and WT strain JE2 EVs were  
297 toxic at concentrations as low as 1 µg/ml. In contrast, JE2 $\Delta agr\Delta spa$  mutant EVs and the eng-EVs  
298 from JE2 $\Delta agr\Delta spa$  (pHla<sub>H35L</sub>-LukE) exhibited negligible toxicity (Fig. S3a). HL60 cells are resistant  
299 to Hla-mediated lysis, but they are susceptible to the cytolytic activity of the *S. aureus* leukocidins  
300 (including HlgAB, HlgCB, PVL-SF, LukED, LukAB, and phenol soluble modulins [PSMs]). EVs  
301 isolated from strain JE2, but not the  $\Delta agr\Delta spa$  mutant or eng-EVs, were cytolytic for HL60 cells  
302 at concentrations as low as 1 µg/ml (Fig. S3b). Rabbit erythrocytes are susceptible to Hla, PSMs,  
303 and the leukocidins HlgAB and LukED<sup>61,62</sup>. EVs isolated from WT strain JE2 exhibited significant  
304 hemolytic activity at concentrations as low as 1 µg/ml, but no hemolytic activity resulted from EVs  
305 prepared from the  $\Delta agr\Delta spa$  mutant or eng-EVs, even at 20 µg/ml (Fig. S3c). These data  
306 demonstrate that the eng-EVs were nontoxic in vitro for mammalian cells.

307 We immunized mice on days 0, 14, and 28 with 5 µg EVs from JE2 $\Delta agr$  or JE2 $\Delta agr\Delta spa$   
308 mutants; control mice were given 5 µg bovine serum albumin (BSA). Whereas sera from mice  
309 immunized with both eng-EVs and  $\Delta agr\Delta spa$  EVs, but not BSA, reacted by ELISA with sonicated  
310 WT JE2 EVs (Fig. 6a), only mice given the eng-EVs responded with antibodies to purified Hla  
311 (Fig. 6b) or LukE (Fig. 6c). These data indicate that recombinant proteins packaged within  
312 *S. aureus* EV are immunogenic.

313 To examine whether the antibodies elicited in mice by the eng-EV vaccine were functional,  
314 toxin neutralizing assays were performed. Sera from mice immunized with eng-EVs effectively  
315 neutralized Hla at dilutions ranging from 1:20 to 1:80 (Fig. 6d). In contrast, neutralizing antibodies  
316 were low or undetectable in serum from mice given BSA or  $\Delta agr\Delta spa$  EVs. Similarly, sera from  
317 mice immunized with eng-EVs, but not BSA or  $\Delta agr\Delta spa$  EVs, were able to effectively neutralize  
318 LukED at dilutions ranging from 1:10 to 1:20 (Fig. 6e). Sera from mice immunized with eng-EVs  
319 also neutralized leukocidin HlgAB (Fig. 6f), but not PVL-SF or HlgCB leukotoxins.

320 The immunized mice were challenged with USA500 strain NRS685, a PVL-negative MRSA

321 bacteremia isolate. We chose this strain because the PVL-S and PVL-F subunits can interact with  
322 LukE and LukD to form inactive hybrid complexes, and this influences LukED-mediated *S. aureus*  
323 virulence in mice<sup>63</sup>. As shown in Fig. 6g, immunization with eng-EVs, but not  $\Delta agr\Delta spa$  EVs,  
324 protected 50% of the mice in the lethal sepsis model.

## 325 **Discussion**

326 Membrane vesicles, produced by mammalian cells, fungi, and bacteria, is an evolutionarily  
327 conserved secretory pathway that allows cell-free intercellular communication<sup>64-66</sup>. Microbial EVs  
328 encapsulate cargo that include lipids, proteins, glycans, and nucleic acids, which have been  
329 shown to play roles in microbial physiology, pathogenesis, and the transmission of biological  
330 signals into host cells to modulate biological processes and host innate immune  
331 responses<sup>64,65,67,68</sup>. In Gram-negative bacteria, EVs are generated by pinching off the outer  
332 membrane, but the mechanism(s) by which EVs escape the thick cell walls of Gram-positive  
333 bacteria, mycobacteria, and fungi is unknown. Once shed, *S. aureus* EVs can undergo cholesterol-  
334 dependent fusion with host cell membranes to deliver their toxic cargo<sup>28</sup>. *S. aureus* EVs have  
335 been shown to be produced in vivo during experimental pneumonia in mice<sup>28</sup>. In this report, we  
336 demonstrate unique properties associated with EV production by JE2, a *S. aureus* USA300 strain  
337 that is representative of the CA-MRSA clone that has rapidly disseminated in the United States.  
338 Similar to EVs characterized from other *S. aureus* isolates<sup>16,17,28</sup>, JE2 EVs encapsulate an array  
339 of bacterial antigens, including lipoproteins, exotoxins, and cytoplasmic proteins.

340  
341 In an effort to better understand the multiple stages of EV biogenesis in *S. aureus*, we  
342 evaluated putative factors that modulate the membrane and PGN related steps of EV release.  
343 We first explored the influence of PSMs on the membrane step of this process. PSMs are a group  
344 of small alpha helical peptides that have surfactant-like properties and potent cytolytic activity for  
345 leukocytes and other host cells, as well as membrane disturbing activity on the producing  
346 *S. aureus* cell<sup>5</sup>. PSM $\alpha$  peptides are 20-22 amino acids in length, whereas PSM $\beta$  peptides are 43-

347 45 amino acids in length<sup>35</sup>. In our studies, PSM $\alpha$  peptides, but not PSM $\beta$  peptides, supported the  
348 generation of EVs from *S. aureus*. EVs from the PSM $\alpha$  mutant were less abundant and smaller  
349 in size compared with WT EVs. Although PSM $\beta$  peptides did not significantly reduce EV yield, the  
350 smaller size of the mutant EVs suggest that PSM $\beta$  peptides may play an accessory role in EV  
351 biogenesis. In an *S. aureus* mutant that lacks the PSM transporter protein, PSMs accumulate  
352 intracellularly, causing cytoplasmic membrane perturbations<sup>69</sup>. A recent study reported that PSM $\alpha$   
353 peptides induced the release of cytoplasmic proteins, lipids, nucleic acids, and ATP into *S. aureus*  
354 culture supernatants, and that this effect was mediated by the membrane-damaging activity of  
355 PSM $\alpha$ <sup>5</sup>. Surfactants or surfactant-like proteins with amphipathic helical structures have been  
356 shown to insert into lipid monolayers and generate local deformation<sup>70,71</sup>. PSMs, due to their  
357 surfactant-like activity as well as amphipathic helical structure, may enhance membrane curvature  
358 under cytoplasmic turgor pressure, resulting in membrane disruption and the formation of EVs.

359 The *S. aureus* cell envelope is comprised of a thick, highly cross-linked PGN layer,  
360 proteins, and glycopolymers like WTA and CP. When we assessed the role of the PGN layer on  
361 EV release, we found that highly crosslinked PGN serves as a barrier for EV biogenesis.  
362 Treatment of *S. aureus* with sublethal concentration of penicillin G or genetic inactivation of *pbp4*  
363 or *tagO*, which result in reductions in PGN cross-linking, resulted in a significant increase in EV  
364 production, as well as the average size of released EVs. This inverse correlation between PGN  
365 cross-linking and EV yield was not unique to USA300 strain JE2 but was also observed with  
366 *S. aureus* strains MW2, COL, and Newman. WTA has been shown to be critical for PGN-  
367 crosslinking by regulating PBP4 localization to the septation site<sup>42</sup>. A secondary mechanism by  
368 which WTA regulates EV production is via its ability to control the activity of Atl and Sle1 - not only  
369 by preventing their binding to *S. aureus* cell wall PGN<sup>72,73</sup>, but also by creating an acidic milieu  
370 that limits Atl PGN hydrolase activity<sup>74</sup>. Consequently, autolytic activity is not localized to the  
371 septum area in a *tagO* mutant but is spread throughout the cell surface, likely facilitating EV  
372 release. Of note, Schlag et al. reported that a *tagO* mutant showed an altered cell surface with

373 bobble- and hairy-like protrusions<sup>72</sup>, which may represent EVs. Although we do not yet fully  
374 understand the mechanism(s) of EV generation in Gram positive bacteria, it seems logical that a  
375 poorly cross-linked cell wall or a cell wall lacking WTA would lessen the barrier to EV release and  
376 generate larger EVs as a result of larger pores within the PGN structure.

377 Autolysins that cleave the PGN barrier also impact the biogenesis of *S. aureus* EVs. Atl and  
378 Sle1 localize to the septum during cell division where they exhibit peptidoglycan hydrolase  
379 activity, resulting in separation of the daughter cells<sup>72,73</sup>. Sle1 is a 32 kDa protein comprised of  
380 an N terminal cell wall binding domain and a C terminal catalytic domain with N-acetyl muramyl-  
381 L-alanine amidase activity. In contrast, Atl is a 138 kDa bifunctional PGN hydrolase that is  
382 processed to yield a 62 kDa protein with amidase activity (similar to that of Sle1) and a 51 kDa  
383 protein with endo- $\beta$ -N-acetyl glucosaminidase activity. In addition to its activity in cell  
384 separation, Atl is also involved in cell wall turnover and penicillin- or detergent-induced  
385 bacterial autolysis. Both Atl and Sle1 proteins are present in EVs isolated from USA300 JE2, as  
386 well as ATCC 14458<sup>16</sup>, although Atl is more abundant. Nonetheless, deletion of Sle1, but not Atl,  
387 significantly reduced *S. aureus* EV production. Pasztor et al. reported that an SA113 *atl* mutant  
388 overexpressed eight putative secondary PGN hydrolases both at the transcriptional and at the  
389 protein levels, highlighting the supplementary role of these alternative autolysins in the absence  
390 of Atl<sup>4</sup>. This observation may at least partially explain why JE2 $\Delta atl$  and Newman $\Delta atl$  showed only  
391 a modest reduction in EV yield. Mutations in either *sle1* or *atl* resulted in a significant decrease in  
392 EV size. Although both autolysin activities are localized to the *S. aureus* septum region, EVs have  
393 been visualized surrounding the bacterial surface<sup>7,16,75</sup>. A recent report demonstrated differential  
394 roles for Atl and Sle1 during cell division and separation<sup>76</sup>. Whereas Sle1 could be visualized over  
395 the entire septal surface, Atl localized only at the external (surface-exposed) edge of the  
396 septum<sup>77</sup>. How autolysins modulate EV release from the cell wall or whether this process is  
397 spatially or temporally regulated remains to be determined.



398 *S. aureus* CPs were associated with or packaged within EVs isolated from *S. aureus* strain  
399 Newman and MN8 in our study. We reported that *S. aureus* CP was shed from broth-grown  
400 *S. aureus* cells<sup>78</sup>, and it is feasible that EVs could serve as a vehicle to liberate CP from the cell  
401 envelope. The *S. pneumonia* capsule was reported to hinder EV release in this pathogen<sup>7</sup>,  
402 whereas no effect was observed on EV yield in strains with or without the hyaluronic capsule of  
403 *S. pyogenes*<sup>8</sup>. Whether these streptococcal CPs are present as EV cargo in these pathogens was  
404 not addressed. In our hands, *S. aureus* CPs did not hinder the release of EVs from encapsulated  
405 *S. aureus*. Although EV yield varied among different isolates, we recovered similar quantities of  
406 EVs from isogenic strains that varied only in CP production. The glucuronoxylomannan capsule  
407 of *Cryptococcus neoformans* has been identified as a component of EVs from this fungal  
408 pathogen<sup>79</sup>, and polysaccharide A from *Bacteroides fragilis* was shown to be packaged into OMVs  
409 that were capable of inducing immunomodulatory signaling in dendritic cells<sup>68</sup>. Ongoing studies  
410 in our laboratory will address whether *S. aureus* EV-host cell interactions impact of the  
411 pathogenesis of staphylococcal disease.

412 Extensive efforts have been made to develop vaccines against *S. aureus* infections in  
413 humans. Although a vaccine to prevent *S. aureus* disease is still not available, a growing body of  
414 evidence has suggested that a successful vaccine should target multiple antigens (toxoids,  
415 adhesins, and anti-phagocytic polysaccharides) that play distinct roles in *S. aureus* pathogenesis.  
416 Immunization with *S. pneumoniae* EVs protected mice against lethality<sup>7</sup>. Moreover, immunization  
417 of mice with native EVs from *S. aureus* ATCC 14458 elicited a robust T cell response and  
418 protected mice against pneumonia<sup>27</sup>. Although the latter study demonstrated the immunogenicity  
419 and potential of staphylococcal EVs as a vaccine platform, limitations of the report include  
420 challenge with the homologous strain and failure to acknowledge the documented cytolytic activity  
421 of EVs prepared from WT *S. aureus*<sup>28</sup>.

422           Because strain JE2 produced EVs that were cytotoxic in vitro when incubated with  
423 eukaryotic cells, we mutated *agr*, an *S. aureus* global regulator. As predicted, EVs from JE2 $\Delta$ *agr*  
424 showed undetectable toxicity against epithelial cells, neutrophils, and erythrocytes. Moreover, LC-  
425 MS/MS analyses revealed that the cytolytic toxins were present in EVs from the WT strain but not  
426 the  $\Delta$ *agr* $\Delta$ *spa* double mutant. We also deleted *spa* in the EV host strain since an *agr* mutant  
427 overexpresses Spa, which binds to immunoglobulins by their Fc fragment and dampens antibody  
428 development by cross-linking the Fab domain of V<sub>H</sub>3-type B cell receptors<sup>48</sup>. Indeed, sera from  
429 mice immunized with JE2 $\Delta$ *agr* $\Delta$ *spa* EVs reacted by immunoblot with a greater diversity of  
430 *S. aureus* proteins than sera from mice vaccinated with JE2 $\Delta$ *agr* EVs. Moreover, mice immunized  
431 with JE2 $\Delta$ *agr* $\Delta$ *spa* EVs showed a significant reduction in lethality provoked by WT USA300 strain  
432 FPR3757 compared to mice given PBS or JE2 $\Delta$ *agr* EVs.

433           To enhance the protective efficacy of  $\Delta$ *agr* $\Delta$ *spa* EVs as a vaccine platform, nontoxic  
434 Hla<sub>H35L</sub> and LukE were expressed in JE2 $\Delta$ *agr* $\Delta$ *spa* under the control of the *agr*-derepressed *spa*  
435 promoter. Immunization with purified nontoxic Hla<sub>H35L</sub> prevents lethal pneumonia and lethal  
436 peritonitis and reduces the incidence of necrotic skin abscesses<sup>54-56</sup>. *S. aureus* leukocidins  
437 comprise a family of pore-forming toxins produced by *S. aureus* that target monocytes,  
438 lymphocytes, neutrophils, and macrophages - the very cells responsible for resolution of bacterial  
439 infection. These “eng-EVs” elicited antibodies in the sera of immunized mice that reacted with Hla  
440 and LukE by ELISA and neutralized the cytolytic activity of Hla, LukED, and HlgAB in vitro.

441           Mice immunized with eng-EVs,  $\Delta$ *agr* $\Delta$ *spa* EVs, or BSA were challenged with USA500  
442 strain NRS685, a PVL-negative MRSA bacteremia isolate. LukED has been shown to enhance  
443 lethality in mice challenged with *S. aureus*<sup>80</sup>, and the presence of PVL modulates LukED-  
444 mediated *S. aureus* virulence in mice<sup>63</sup>. Immunization with eng-EVs, but not  $\Delta$ *agr* $\Delta$ *spa* EVs,  
445 protected 50% of the mice in the lethal sepsis model. Protective efficacy against additional  
446 *S. aureus* strains and in additional infection models remains to be evaluated. Over-expression of

447 additional antigens that have been shown to protect mice against experimental *S. aureus*  
448 infections, such as MntC and FhuD2<sup>49-51,81</sup>, in second-generation eng-EVs may yield a more  
449 efficacious vaccine. LC-MS/MS analysis of EVs from both WT JE2 and the  $\Delta agr\Delta spa$  mutant  
450 strain contained multiple lipoproteins. As a predominant TLR2 ligand, lipoproteins have been  
451 increasingly used as novel adjuvant components<sup>82,83</sup> because they are potent activators of host  
452 innate immunity and can mediate humoral and cell mediated immune responses.

453 In summary, we have generated, purified, and characterized EVs isolated from *S. aureus*  
454 USA300, the predominant CA-MRSA clone in United States. Our study revealed that *S. aureus*  
455 PSMs are central for EVs generation by targeting the cytoplasmic membrane. Likewise, the Sle1  
456 autolysin is critical for the release of EVs from *S. aureus* cell wall. Whereas mutations in Atl or  
457 CP production did not affect EV yield, PBP4 and WTA promote PGN cross-linking and  
458 consequently diminished EV production. Our study elucidates certain mechanisms whereby  
459 *S. aureus* produces and sheds EVs (Fig. 7) and will ultimately further our understanding of  
460 bacterial physiology and pathogenesis. We designed and created eng-EVs as a novel vaccine  
461 platform against *S. aureus* infection. Detoxified EVs that over-produced Hla<sub>H35L</sub> and LukE were  
462 immunogenic, elicited toxin neutralizing antibodies, and protected mice in a *S. aureus* lethal  
463 sepsis model, indicating that these naturally produced vesicles have potential as a novel vaccine  
464 platform.

## 465 **Materials and Methods**

466 **Bacterial strains and plasmids.** *S. aureus* isolates (listed in Table S3) were cultivated overnight  
467 with aeration in tryptic soy broth (TSB; Difco) at 37°C. *Escherichia coli* strain XL-10 (Agilent), used  
468 in DNA cloning experiments, was grown at 37°C in Luria Broth (LB; Difco). *S. aureus* - *E. coli*  
469 shuttle vector pCU1<sup>84</sup> was used for cloning and expression of appropriate genes in *S. aureus*.  
470 Antibiotics were added in the following concentrations: penicillin G (penG; 0.2 µg ml<sup>-1</sup>), ampicillin

471 (Amp; 100  $\mu\text{g ml}^{-1}$ ), erythromycin (Em; 5  $\mu\text{g ml}^{-1}$ ), chloramphenicol (Cm; 10  $\mu\text{g ml}^{-1}$ ), kanamycin  
472 (Kan; 50  $\mu\text{g ml}^{-1}$ ), or tetracycline (Tet; 5  $\mu\text{g ml}^{-1}$ ).

473 **DNA manipulation.** Fey et al. derived *S. aureus* JE2 from the USA300 strain LAC by curing it of  
474 plasmids<sup>85</sup>, rendering it sensitive to Em. The *agr* mutation ( $\Delta agr::tetM$ ) was transduced from  
475 *S. aureus* RN6911<sup>86</sup> to wild-type (WT) JE2 using bacteriophage  $\phi 80\alpha$  with selection for Tet  
476 resistance. To construct the JE2  $\Delta agr\Delta spa$  double mutant, the *spa* mutation was transduced from  
477 JE2 (*spa::ermB*) to JE2 $\Delta agr$  by  $\phi 80\alpha$  transduction. The *pbp4* mutation was transduced from JE2  
478 ( $\Delta pbp4::ermB$ ) to WT MW2 and COL by  $\phi 80\alpha$  transduction with selection for Em resistance. All  
479 mutants were confirmed by PCR using the primers listed in Table S4. ELISA results confirmed  
480 the phenotype of the  $\Delta spa$  mutant, and the *agr* mutants lost their hemolytic phenotype. To  
481 construct the WTA mutants, the *tagO* mutation was transduced from SA1113  $\Delta tagO$  (pRB*tagO*) to  
482 WT JE2 and COL with  $\phi 80\alpha$  with selection for Em resistance. Mutants were confirmed by PCR  
483 and acquisition of resistance to lysis by  $\phi 80\alpha$ .

484 To construct a shuttle vector for expression of Hla<sub>H35L</sub> and Luke, the *spa* promoter, *hla*<sub>H35L</sub>,  
485 and *lukE* genes were amplified from *S. aureus* strains JE2, DU1090 (pHla<sub>H35L</sub>), and FRP3757,  
486 respectively. To drive the expression of *hla*<sub>H35L</sub>, its sequence was fused to the 3' terminus of the  
487 *spa* promoter containing the ribosome binding site by overlapping PCR. The P<sub>*spa*</sub>-*hla*<sub>H35L</sub> fusion  
488 sequence was cloned into the shuttle plasmid pCU1 with restriction enzymes HindIII and Sall.  
489 The amplified *lukE* sequence containing a ribosome binding site was inserted into pCU1 with  
490 restriction enzymes Sall and EcoRI. The resulting plasmid pCU1-P<sub>*spa*</sub>-*hla*<sub>H35L</sub>-*lukE* was verified by  
491 enzyme digestion and DNA sequencing. To construct JE2 $\Delta spa\Delta agr$  expressing nontoxic Hla<sub>H35L</sub>  
492 and Luke, pCU1-P<sub>*spa*</sub>-*hla*<sub>H35L</sub>-*lukE* was transformed into RN4220 by electroporation and then  
493 transduced with  $\phi 80\alpha$  to JE2 $\Delta spa\Delta agr$ , selecting for Cm resistance.

494 **Isolation and purification of EVs.** Isolation of EVs from *S. aureus* was performed as previously  
495 described<sup>7,16</sup> with minor modifications. *S. aureus* was cultivated in TSB with shaking to an OD<sub>650 nm</sub>  
496 of 1.2. The culture supernatant was filtered and concentrated 25-fold with a 100-kDa tangential  
497 flow filtration system (Pall Corp.). The retentate was filtered again before centrifugation at  
498 150,000 g for 3 h at 4°C to pellet the vesicles and leave soluble proteins in the supernatant. The  
499 EV pellet was suspended in 40% Optiprep density gradient medium (Sigma) and overlaid with  
500 gradient layers of Optiprep ranging from 35% to 10%. After centrifugation at 139,000 g for 16 h at  
501 4°C, 1 ml fractions were removed sequentially from the top of the gradient. Each fraction was  
502 subjected to SDS-PAGE and stained with a Thermo Fisher silver staining kit. Fractions with a  
503 similar protein profile on SDS-PAGE were pooled, and the Optiprep medium was removed by  
504 diafiltration with phosphate-buffered saline (PBS; 10 mM Na<sub>2</sub>HPO<sub>4</sub>, 2 mM KH<sub>2</sub>PO<sub>4</sub>, 2.7 mM KCl,  
505 and 137 mM NaCl, pH 7.4) using an Amicon Ultra-50 Centrifugal Filter Unit. The diafiltered  
506 retentate was filtered (0.45 µm) and stored at 4°C. EV protein concentrations were determined by  
507 using a Protein Assay Dye Reagent (Bio-Rad). The size distribution and diameter of vesicles was  
508 measured using a ZetaPALS dynamic light scattering detector (Brookhaven Instruments Corp.).  
509 Nanoparticle tracking analysis (NTA) was performed by purifying EVs from 100 ml bacterial  
510 cultures, as described above. The number of EV particles recovered from individual cultures (and  
511 suspended in 1 ml PBS) was determined using a Nanosight NS300 Sub Micron Particle Imaging  
512 System (Malvern), as previously described<sup>87</sup>.

513 **Electron microscopy of *S. aureus* EVs.** Five microliters of *S. aureus* EVs were adsorbed for  
514 1 min to a carbon coated grid that was made hydrophilic by a 30-sec exposure to a glow discharge.  
515 The samples were stained with 0.75% uranyl formate for 30 sec and examined in a JEOL 1200EX  
516 or a TecnaiG<sup>2</sup> Spirit BioTWIN transmission electron microscope. Images were recorded with an  
517 AMT 2k CCD camera.

518 **Proteomic analysis of EVs by LC-MS/MS.** *S. aureus* EVs (8-10 µg) were subjected to SDS-  
519 PAGE and stained with Coomassie Blue R-250. Gel sections were analyzed by the Taplin mass  
520 spectrometry facility at Harvard Medical School. Peptide sequences (and hence protein identity)  
521 were determined by matching protein databases with the acquired fragmentation pattern using  
522 the software program Sequest (Thermo Fisher Scientific, Waltham, MA). Proteins were identified  
523 by a minimum of two peptides and at least one unique peptide. Sequence analysis was performed  
524 with a database containing protein sequences of the *S. aureus* USA300 FPR3757 genome  
525 downloaded from NCBIprot. The subcellular localization of each identified protein was predicted  
526 by PsortB v.3.0 ([www.psort.org/psorb/](http://www.psort.org/psorb/)).

527 **Real time RT-PCR assay.** *S. aureus* strains were cultivated in 5 ml TSB at 37°C to an OD<sub>650 nm</sub>  
528 of 0.9. After centrifugation at 4°C, the bacterial cells were mixed with glass beads in 300 µl lysis  
529 buffer (RNeasy mini kit; Qiagen) and lysed by using a high speed Ultramat 2 Amalgamator (SDI,  
530 Inc.). Total RNA from the lysate supernatant was purified with the RNeasy mini kit (Qiagen),  
531 treated with DNase I (Invitrogen), and stored at -70°C. cDNA was synthesized from 1 µg of  
532 bacterial RNA using a Protoscript II First Strand cDNA synthesis kit (New England Biolabs). 50  
533 ng of synthesized cDNA was subjected to Real-time RT-PCR using a Power Green PCR Master  
534 Mix (Applied Biosystems) with primers listed in Table S4 and detected in a StepOnePlus Real-  
535 Time PCR System (Applied Biosystems). The relative transcriptional levels of *hla*<sub>H35L</sub> and *lukE*  
536 were calculated using the  $\Delta\Delta C_t$  method by normalizing to the 16s rRNA transcriptional level.

537 **Immunoblotting assays.** For Western blots, 10 µg *S. aureus* EVs were subjected to SDS-PAGE,  
538 transferred to nitrocellulose membranes, and blocked with PBS + 0.05% Tween-20 (PBST) and  
539 1% skim milk for 1 h at room temperature (RT). After washing with PBST, the membranes were  
540 incubated with rabbit anti-LukS-PV (IBT Bioservices) or mouse anti-Hla monoclonal antibody  
541 (mAb) 6C12 (IBT Bioservices) overnight at 4°C. The membranes were washed and incubated

542 with secondary antibodies (HRP-conjugated goat anti-rabbit IgG or HRP-conjugated goat-anti  
543 mouse IgG) for 2 h at RT before developing the blots using TMB membrane peroxidase substrate  
544 (Kirkegaard & Perry Laboratories, Inc). Purified Hla (List Biological Labs) and LukE (IBT  
545 Bioservices) were used as positive controls.

546 For EV dot blotting assays, intact or sonicated EVs were applied to nitrocellulose  
547 membranes using a 96 well dot blotter system (Bio-Rad). To block the staphylococcal IgG binding  
548 proteins Spa and Sbi, the membranes were blocked with PBST + 5% skim milk and incubated  
549 overnight at 4°C with an irrelevant human IgG1 monoclonal antibody (10 µg/ml) in PBST + 1%  
550 skim milk. The membrane was washed with PBST and incubated overnight at 4°C with sera  
551 (diluted 1:1000 in PBST + 1% skim milk) pooled from mice immunized with EVs (see below) or  
552 murine mAbs<sup>78</sup> to CP5 (4C2; 1.2 µg/ml) or CP8 (5A6; 1.2 µg/ml). After washes with PBST, the  
553 membrane was incubated with alkaline phosphatase (AP)-conjugated goat anti-mouse antibody  
554 (1:15000 dilution in PBST + 1% skim milk) at RT for 2 h. The membrane was washed with PBST  
555 and developed with AP membrane substrate (KPL).

556 **EV cytotoxicity.** The relative toxicity of *S. aureus* EVs (1 to 20 µg/ml) toward human A549 lung  
557 epithelial cells, neutrophil-like HL60 cells, and rabbit erythrocytes was assessed. A549 lung  
558 epithelial cells grown in a 96-well plate were incubated overnight at 37°C with EVs or 1 µg/ml of  
559 purified Hla. Toxicity was assessed using an LDH cytotoxicity assay kit (ThermoFisher Scientific).  
560 Differentiated HL60 cells (2 x 10<sup>5</sup> cells) were seeded in 96-well plate and treated with EVs or  
561 1 µg/ml of Panton-Valentine leukocidin (PVL) for 4 h at 37°C. Cell viability was measured with a  
562 CellTiter kit (Promega). A 2% rabbit erythrocyte suspension was mixed with EVs or 1 µg/ml Hla  
563 in a 96-well plate for 1 h at 37°C. The erythrocytes were pelleted by centrifugation, and hemolysis  
564 was recorded by measuring the OD<sub>545 nm</sub> of the supernatant using an ELISA reader.

565

566 **Animal studies.** Mouse experiments were carried out in accordance with the recommendations  
567 in the PHS Policy on Humane Care and Use of Laboratory Animals, and animal use protocols  
568 were approved by the Partners Healthcare Institutional Animal Care and Use Committee. Female  
569 Swiss Webster mice (4 weeks old; Charles River) were immunized by the subcutaneous (s.c.)  
570 route on days 0, 14, and 28 with 5 µg/ml of  $\Delta agr$  EVs,  $\Delta agr\Delta spa$  EVs, or eng-EVs. Control animals  
571 were immunized similarly with bovine serum albumin (BSA; Sigma). Blood was collected from the  
572 mice by tail vein puncture before each vaccination and again before challenge. Sera were diluted  
573 1:100 and tested by ELISA on 96-well plates coated with 5 µg/ml sonicated WT EVs, 5 µg/ml  
574 LukE, or 1 µg/ml Hla. Immunized mice were inoculated with  $\sim 2 \times 10^8$  CFU *S. aureus* by  
575 intravenous (IV) tail vein injection two weeks after the third vaccination. Survival was monitored  
576 up to 14 days post-challenge, and the data were analyzed using the log-rank test.

577 **Toxin neutralization assays (TNAs).** For Hla TNAs, the assay was performed as we previously  
578 described<sup>88</sup>. For leukocidin TNAs, human blood was collected from healthy volunteers giving  
579 written informed consent, as approved by the Institutional Review Board of The Brigham and  
580 Women's Hospital (Human Subject Assurance Number 00000484). Neutrophils were isolated  
581 from 10 ml human blood using Polymorphprep (Accurate Chemical), washed, and suspended in  
582 RPMI (Invitrogen) containing 5% fetal bovine serum (Invitrogen). Sera from immunized mice were  
583 serially diluted and mixed with toxin concentrations yielding  $\sim 75\%$  cell lysis (12.5 µg/ml LukED,  
584 2.5 µg/ml PVL, 1 µg/ml HlgAB, or 2 µg/ml HlgCB (1:1 S and F subunits). Samples were pre-  
585 incubated with leukocidins for 30 min at RT before the addition of neutrophils ( $1.2 \times 10^5$  cells). After  
586 2 h at 37°C in 5% CO<sub>2</sub>, the cells were harvested by centrifugation and suspended in fresh medium.  
587 Cell viability was evaluated using CellTiter kit (Promega) according to the manufacturer's  
588 recommendations. Percent neutralization was calculated using the formula: [% Viability of (serum  
589 + leukocidin + neutrophils) - % Viability of (leukocidin + neutrophils)].



590 **Author contributions**

591 X.W. initiated the project, and X.W., C.W. and J.C.L designed experiments. X.W. performed  
592 experiments. X.W. and J.C.L analyzed data, and X.W., C.W., and J.C.L wrote the manuscript.

593 **Acknowledgements**

594 We are grateful to Drs. Michael Otto for providing the *S. aureus psm* mutants, Jianxun Ding for  
595 providing assistance with DLS and NTA experiments, and Matthew Waldor for use of the  
596 StepOnePlus Real-Time PCR System. Christopher Thompson and Anthony Yeh provided expert  
597 technical assistance.

598 **Data availability**

599 Mass spectrometry proteomics data were deposited in the ProteomeXchange Consortium  
600 (<http://proteomecentral.proteomexchange.org>) via the PRIDE partner repository<sup>89</sup> with the data  
601 set identifier PXD007953. Additional data that support the findings of this study are available  
602 from the corresponding author upon request.

603 **Competing interests**

604 The authors declare no competing financial interests.

605

606 **References**

607

608 1. Geoghegan, J. A. & Foster, T. J. Cell wall-anchored surface proteins of *Staphylococcus*  
609 *aureus*: many proteins, multiple functions. *Curr Top Microbiol Immunol*.

610 [https://doi.org/10.1007/82\\_2015\\_5002](https://doi.org/10.1007/82_2015_5002) (2015).

- 611 2. Weidenmaier, C. & Lee, J. C. Structure and function of surface polysaccharides of  
612 *Staphylococcus aureus*. *Curr Top Microbiol Immunol*.  
613 [https://doi.org/10.1007/82\\_2015\\_5018](https://doi.org/10.1007/82_2015_5018) (2016).
- 614 3. Otto, M. *Staphylococcus aureus* toxins. *Curr Opin Microbiol* 17, 32-37 (2014).
- 615 4. Pasztor, L. *et al.* Staphylococcal major autolysin (Atl) is involved in excretion of  
616 cytoplasmic proteins. *J Biol Chem* 285, 36794-36803 (2010).
- 617 5. Ebner, P. *et al.* Non-classical protein excretion is boosted by PSM $\alpha$ -induced cell  
618 leakage. *Cell Rep* 20, 1278-1286 (2017).
- 619 6. Rivera, J. *et al.* *Bacillus anthracis* produces membrane-derived vesicles containing  
620 biologically active toxins. *Proc Natl Acad Sci U S A* 107, 19002-19007 (2010).
- 621 7. Olaya-Abril, A. *et al.* Characterization of protective extracellular membrane-derived  
622 vesicles produced by *Streptococcus pneumoniae*. *J Proteomics* 106, 46-60 (2014).
- 623 8. Resch, U. *et al.* A two-component regulatory system impacts extracellular membrane-  
624 derived vesicle production in group A *Streptococcus*. *mBio* 7 (2016).
- 625 9. Brown, L., Wolf, J. M., Prados-Rosales, R. & Casadevall, A. Through the wall:  
626 extracellular vesicles in Gram-positive bacteria, mycobacteria and fungi. *Nat Rev*  
627 *Microbiol* 13, 620-630 (2015).
- 628 10. Deatherage, B. L. & Cookson, B. T. Membrane vesicle release in bacteria, eukaryotes,  
629 and archaea: a conserved yet underappreciated aspect of microbial life. *Infect Immun*  
630 80, 1948-1957 (2012).
- 631 11. Knox, K. W., Vesik, M. & Work, E. Relation between excreted lipopolysaccharide  
632 complexes and surface structures of a lysine-limited culture of *Escherichia coli*. *J*  
633 *Bacteriol* 92, 1206-1217 (1966).
- 634 12. Bladen, H. A. & Waters, J. F. Electron microscopic study of some strains of *Bacteroides*.  
635 *J Bacteriol* 86, 1339-1344 (1963).

- 636 13. Roier, S. *et al.* A novel mechanism for the biogenesis of outer membrane vesicles in  
637 Gram-negative bacteria. *Nat Commun* 7, 10515 (2016).
- 638 14. Ellis, T. N. & Kuehn, M. J. Virulence and immunomodulatory roles of bacterial outer  
639 membrane vesicles. *Microbiol Mol Biol Rev* 74, 81-94 (2010).
- 640 15. Kim, J. H., Lee, J., Park, J. & Gho, Y. S. Gram-negative and Gram-positive bacterial  
641 extracellular vesicles. *Semin Cell Dev Biol* 40, 97-104 (2015).
- 642 16. Lee, E. Y. *et al.* Gram-positive bacteria produce membrane vesicles: proteomics-based  
643 characterization of *Staphylococcus aureus*-derived membrane vesicles. *Proteomics* 9,  
644 5425-5436 (2009).
- 645 17. Jeon, H. *et al.* Variation among *Staphylococcus aureus* membrane vesicle proteomes  
646 affects cytotoxicity of host cells. *Microb Pathog* 93, 185-193 (2016).
- 647 18. Hong, S. W. *et al.* Extracellular vesicles derived from *Staphylococcus aureus* induce  
648 atopic dermatitis-like skin inflammation. *Allergy* 66, 351-359 (2011).
- 649 19. Hong, S. W. *et al.* An important role of alpha-hemolysin in extracellular vesicles on the  
650 development of atopic dermatitis induced by *Staphylococcus aureus*. *PLoS One* 9,  
651 e100499 (2014).
- 652 20. Jun, S. H. *et al.* *Staphylococcus aureus*-derived membrane vesicles exacerbate skin  
653 inflammation in atopic dermatitis. *Clin Exp Allergy* 47, 85-96 (2017).
- 654 21. Gasparini, R., Amicizia, D., Domnich, A., Lai, P. L. & Panatto, D. *Neisseria meningitidis*  
655 B vaccines: recent advances and possible immunization policies. *Expert Rev Vaccines*  
656 13, 345-364 (2014).
- 657 22. Nieves, W. *et al.* A *Burkholderia pseudomallei* outer membrane vesicle vaccine provides  
658 protection against lethal sepsis. *Clin Vaccine Immunol* 21, 747-754 (2014).
- 659 23. Wang, Z., Lazinski, D. W. & Camilli, A. Immunity provided by an outer membrane vesicle  
660 cholera vaccine is due to O-antigen-specific antibodies inhibiting bacterial motility. *Infect*  
661 *Immun* 85 (2017).

- 662 24. Prados-Rosales, R. *et al.* Mycobacterial membrane vesicles administered systemically in  
663 mice induce a protective immune response to surface compartments of *Mycobacterium*  
664 *tuberculosis*. *mBio* 5, e01921-01914 (2014).
- 665 25. Chen, L. *et al.* Outer membrane vesicles displaying engineered glycotopes elicit  
666 protective antibodies. *Proc Natl Acad Sci U S A* 113, E3609-3618 (2016).
- 667 26. Fowler, V. G., Jr. & Proctor, R. A. Where does a *Staphylococcus aureus* vaccine stand?  
668 *Clin Microbiol Infect* 20 Suppl 5, 66-75 (2014).
- 669 27. Choi, S. J. *et al.* Active immunization with extracellular vesicles derived from  
670 *Staphylococcus aureus* effectively protects against staphylococcal lung infections,  
671 mainly via Th1 cell-mediated immunity. *PLoS One* 10, e0136021 (2015).
- 672 28. Gurung, M. *et al.* *Staphylococcus aureus* produces membrane-derived vesicles that  
673 induce host cell death. *PLoS One* 6, e27958 (2011).
- 674 29. Bielaszewska, M. *et al.* Enterohemorrhagic *Escherichia coli* hemolysin employs outer  
675 membrane vesicles to target mitochondria and cause endothelial and epithelial  
676 apoptosis. *PLoS Pathog* 9, e1003797 (2013).
- 677 30. Altindis, E., Fu, Y. & Mekalanos, J. J. Proteomic analysis of *Vibrio cholerae* outer  
678 membrane vesicles. *Proc Natl Acad Sci U S A* 111, E1548-1556 (2014).
- 679 31. Fulsundar, S. *et al.* Molecular characterization of outer membrane vesicles released  
680 from *Acinetobacter radioresistens* and their potential roles in pathogenesis. *Microb*  
681 *Pathog* 83-84, 12-22 (2015).
- 682 32. Thay, B., Wai, S. N. & Oscarsson, J. *Staphylococcus aureus* alpha-toxin-dependent  
683 induction of host cell death by membrane-derived vesicles. *PLoS One* 8, e54661 (2013).
- 684 33. Dantes, R. *et al.* National burden of invasive methicillin-resistant *Staphylococcus aureus*  
685 infections, United States, 2011. *JAMA Intern Med* 173, 1970-1978 (2013).
- 686 34. Wang, R. *et al.* Identification of novel cytolytic peptides as key virulence determinants for  
687 community-associated MRSA. *Nat Med* 13, 1510-1514 (2007).

- 688 35. Cheung, G. Y., Joo, H. S., Chatterjee, S. S. & Otto, M. Phenol-soluble modulins--critical  
689 determinants of staphylococcal virulence. *FEMS Microbiol Rev* 38, 698-719 (2014).
- 690 36. Hanzelmann, D. *et al.* Toll-like receptor 2 activation depends on lipopeptide shedding by  
691 bacterial surfactants. *Nat Commun* 7, 12304 (2016).
- 692 37. Wyke, A. W., Ward, J. B., Hayes, M. V. & Curtis, N. A. A role in vivo for penicillin-binding  
693 protein-4 of *Staphylococcus aureus*. *Eur J Biochem* 119, 389-393 (1981).
- 694 38. Leski, T. A. & Tomasz, A. Role of penicillin-binding protein 2 (PBP2) in the antibiotic  
695 susceptibility and cell wall cross-linking of *Staphylococcus aureus*: evidence for the  
696 cooperative functioning of PBP2, PBP4, and PBP2A. *J Bacteriol* 187, 1815-1824 (2005).
- 697 39. Xia, G. & Peschel, A. Toward the pathway of *S. aureus* WTA biosynthesis. *Chem Biol*  
698 15, 95-96 (2008).
- 699 40. Brown, S., Zhang, Y. H. & Walker, S. A revised pathway proposed for *Staphylococcus*  
700 *aureus* wall teichoic acid biosynthesis based on in vitro reconstitution of the intracellular  
701 steps. *Chem Biol* 15, 12-21 (2008).
- 702 41. Weidenmaier, C. *et al.* Role of teichoic acids in *Staphylococcus aureus* nasal  
703 colonization, a major risk factor in nosocomial infections. *Nat Med* 10, 243-245 (2004).
- 704 42. Atilano, M. L. *et al.* Teichoic acids are temporal and spatial regulators of peptidoglycan  
705 cross-linking in *Staphylococcus aureus*. *Proc Natl Acad Sci U S A* 107, 18991-18996  
706 (2010).
- 707 43. Weidenmaier, C., McLoughlin, R. M. & Lee, J. C. The zwitterionic cell wall teichoic acid  
708 of *Staphylococcus aureus* provokes skin abscesses in mice by a novel CD4+ T-cell-  
709 dependent mechanism. *PLoS One* 5, e13227 (2010).
- 710 44. Biswas, R. *et al.* Activity of the major staphylococcal autolysin Atl. *FEMS Microbiol Lett*  
711 259, 260-268 (2006).

- 712 45. Kajimura, J. *et al.* Identification and molecular characterization of an N-acetylmuramyl-L-  
713 alanine amidase Sle1 involved in cell separation of *Staphylococcus aureus*. *Mol*  
714 *Microbiol* 58, 1087-1101 (2005).
- 715 46. Boyle-Vavra, S. *et al.* USA300 and USA500 clonal lineages of *Staphylococcus aureus*  
716 do not produce a capsular polysaccharide due to conserved mutations in the *cap5* locus.  
717 *mBio* 6, e02585-02514 (2015).
- 718 47. Cocchiaro, J. L. *et al.* Molecular characterization of the capsule locus from non-typeable  
719 *Staphylococcus aureus*. *Mol Microbiol* 59, 948-960 (2006).
- 720 48. Falugi, F., Kim, H. K., Missiakas, D. M. & Schneewind, O. Role of protein A in the  
721 evasion of host adaptive immune responses by *Staphylococcus aureus*. *mBio* 4,  
722 e00575-00513 (2013).
- 723 49. Bagnoli, F. *et al.* Vaccine composition formulated with a novel TLR7-dependent adjuvant  
724 induces high and broad protection against *Staphylococcus aureus*. *Proc Natl Acad Sci U*  
725 *S A* 112, 3680-3685 (2015).
- 726 50. Mishra, R. P. *et al.* *Staphylococcus aureus* FhuD2 is involved in the early phase of  
727 staphylococcal dissemination and generates protective immunity in mice. *J Infect Dis*  
728 206, 1041-1049 (2012).
- 729 51. Mariotti, P. *et al.* Structural and functional characterization of the *Staphylococcus aureus*  
730 virulence factor and vaccine candidate FhuD2. *Biochem J* 449, 683-693 (2013).
- 731 52. Anderson, A. S. *et al.* *Staphylococcus aureus* manganese transport protein C is a highly  
732 conserved cell surface protein that elicits protective immunity against *S. aureus* and  
733 *Staphylococcus epidermidis*. *J Infect Dis* 205, 1688-1696 (2012).
- 734 53. Li, M. *et al.* Evolution of virulence in epidemic community-associated methicillin-resistant  
735 *Staphylococcus aureus*. *Proc Natl Acad Sci U S A* 106, 5883-5888 (2009).
- 736 54. Bubeck Wardenburg, J. & Schneewind, O. Vaccine protection against *Staphylococcus*  
737 *aureus* pneumonia. *J Exp Med* 205, 287-294 (2008).

- 738 55. Rauch, S. *et al.* Abscess formation and alpha-hemolysin induced toxicity in a mouse  
739 model of *Staphylococcus aureus* peritoneal infection. *Infect Immun* 80, 3721-3732  
740 (2012).
- 741 56. Kennedy, A. D. *et al.* Targeting of alpha-hemolysin by active or passive immunization  
742 decreases severity of USA300 skin infection in a mouse model. *J Infect Dis* 202, 1050-  
743 1058 (2010).
- 744 57. Menzies, B. E. & Kernodle, D. S. Passive immunization with antiserum to a nontoxic  
745 alpha-toxin mutant from *Staphylococcus aureus* is protective in a murine model. *Infect*  
746 *Immun* 64, 1839-1841 (1996).
- 747 58. von Eiff, C., Friedrich, A. W., Peters, G. & Becker, K. Prevalence of genes encoding for  
748 members of the staphylococcal leukotoxin family among clinical isolates of  
749 *Staphylococcus aureus*. *Diagn Microbiol Infect Dis* 49, 157-162 (2004).
- 750 59. Reyes-Robles, T. *et al.* *Staphylococcus aureus* leukotoxin ED targets the chemokine  
751 receptors CXCR1 and CXCR2 to kill leukocytes and promote infection. *Cell Host*  
752 *Microbe* 14, 453-459 (2013).
- 753 60. Alonzo, F., 3rd *et al.* CCR5 is a receptor for *Staphylococcus aureus* leukotoxin ED.  
754 *Nature* 493, 51-55 (2013).
- 755 61. Alonzo, F., 3rd & Torres, V. J. The bicomponent pore-forming leucocidins of  
756 *Staphylococcus aureus*. *Microbiol Mol Biol Rev* 78, 199-230 (2014).
- 757 62. Spaan, A. N. *et al.* *Staphylococcus aureus* targets the Duffy antigen receptor for  
758 chemokines (DARC) to lyse erythrocytes. *Cell Host Microbe* 18, 363-370 (2015).
- 759 63. Yoong, P. & Torres, V. J. Counter inhibition between leukotoxins attenuates  
760 *Staphylococcus aureus* virulence. *Nat Commun* 6, 8125 (2015).
- 761 64. Kuehn, M. J. & Kesty, N. C. Bacterial outer membrane vesicles and the host-pathogen  
762 interaction. *Genes Dev* 19, 2645-2655 (2005).

- 763 65. Schertzer, J. W. & Whiteley, M. Bacterial outer membrane vesicles in trafficking,  
764 communication and the host-pathogen interaction. *J Mol Microbiol Biotechnol* 23, 118-  
765 130 (2013).
- 766 66. Hwang, I. Cell-cell communication via extracellular membrane vesicles and its role in the  
767 immune response. *Mol Cells* 36, 105-111 (2013).
- 768 67. Koeppen, K. *et al.* A novel mechanism of host-pathogen interaction through sRNA in  
769 bacterial outer membrane vesicles. *PLoS Pathog* 12, e1005672 (2016).
- 770 68. Shen, Y. *et al.* Outer membrane vesicles of a human commensal mediate immune  
771 regulation and disease protection. *Cell Host Microbe* 12, 509-520 (2012).
- 772 69. Chatterjee, S. S. *et al.* Essential *Staphylococcus aureus* toxin export system. *Nat Med*  
773 19, 364-367 (2013).
- 774 70. Nazari, M., Kurdi, M. & Heerklotz, H. Classifying surfactants with respect to their effect  
775 on lipid membrane order. *Biophys J* 102, 498-506 (2012).
- 776 71. Drin, G. & Antony, B. Amphipathic helices and membrane curvature. *FEBS Lett* 584,  
777 1840-1847 (2010).
- 778 72. Schlag, M. *et al.* Role of staphylococcal wall teichoic acid in targeting the major autolysin  
779 *Atl*. *Mol Microbiol* 75, 864-873 (2010).
- 780 73. Frankel, M. B. & Schneewind, O. Determinants of murein hydrolase targeting to cross-  
781 wall of *Staphylococcus aureus* peptidoglycan. *J Biol Chem* 287, 10460-10471 (2012).
- 782 74. Biswas, R. *et al.* Proton-binding capacity of *Staphylococcus aureus* wall teichoic acid  
783 and its role in controlling autolysin activity. *PLoS One* 7, e41415 (2012).
- 784 75. Surve, M. V. *et al.* Membrane vesicles of Group B streptococcus disrupt fetomaternal  
785 barrier leading to preterm birth. *PLoS Pathog* 12, e1005816 (2016).
- 786 76. Monteiro, J. M. *et al.* Cell shape dynamics during the staphylococcal cell cycle. *Nat*  
787 *Commun* 6, 8055 (2015).



- 788 77. Yamada, S. *et al.* An autolysin ring associated with cell separation of *Staphylococcus*  
789 *aureus*. *J Bacteriol* 178, 1565-1571 (1996).
- 790 78. Liu, B., Park, S., Thompson, C. D., Li, X. & Lee, J. C. Antibodies to *Staphylococcus*  
791 *aureus* capsular polysaccharides 5 and 8 perform similarly in vitro but are functionally  
792 distinct in vivo. *Virulence* 8, 859-874 (2017).
- 793 79. Rodrigues, M. L. *et al.* Vesicular polysaccharide export in *Cryptococcus neoformans* is a  
794 eukaryotic solution to the problem of fungal trans-cell wall transport. *Eukaryot Cell* 6, 48-  
795 59 (2007).
- 796 80. Alonzo, F., 3rd *et al.* *Staphylococcus aureus* leucocidin ED contributes to systemic  
797 infection by targeting neutrophils and promoting bacterial growth in vivo. *Mol Microbiol*  
798 83, 423-435 (2012).
- 799 81. Gribenko, A. V. *et al.* High resolution mapping of bactericidal monoclonal antibody  
800 binding epitopes on *Staphylococcus aureus* antigen MntC. *PLoS Pathog* 12, e1005908  
801 (2016).
- 802 82. Brown, L. E. & Jackson, D. C. Lipid-based self-adjuvanting vaccines. *Curr Drug Deliv* 2,  
803 383-393 (2005).
- 804 83. Basto, A. P. & Leitao, A. Targeting TLR2 for vaccine development. *J Immunol Res* 2014,  
805 619410 (2014).
- 806 84. Augustin, J. *et al.* Genetic analysis of epidermin biosynthetic genes and epidermin-  
807 negative mutants of *Staphylococcus epidermidis*. *Eur J Biochem* 204, 1149-1154 (1992).
- 808 85. Fey, P. D. *et al.* A genetic resource for rapid and comprehensive phenotype screening of  
809 nonessential *Staphylococcus aureus* genes. *mBio* 4, e00537-00512 (2013).
- 810 86. Novick, R. P. *et al.* Synthesis of staphylococcal virulence factors is controlled by a  
811 regulatory RNA molecule. *EMBO J* 12, 3967-3975 (1993).

- 812 87. Florez, C., Raab, J. E., Cooke, A. C. & Schertzer, J. W. Membrane distribution of the  
813 pseudomonas quinolone signal modulates outer membrane vesicle production in  
814 *Pseudomonas aeruginosa*. *mBio* 8, e01034-01017 (2017).
- 815 88. Wacker, M. *et al.* Prevention of *Staphylococcus aureus* infections by glycoprotein  
816 vaccines synthesized in *Escherichia coli*. *J Infect Dis* 209, 1551-1561 (2014).
- 817 89. Vizcaino, J. A. *et al.* 2016 update of the PRIDE database and its related tools. *Nucleic*  
818 *Acids Res* 44, 11033 (2016).
- 819
- 820

821 **Figures**

822

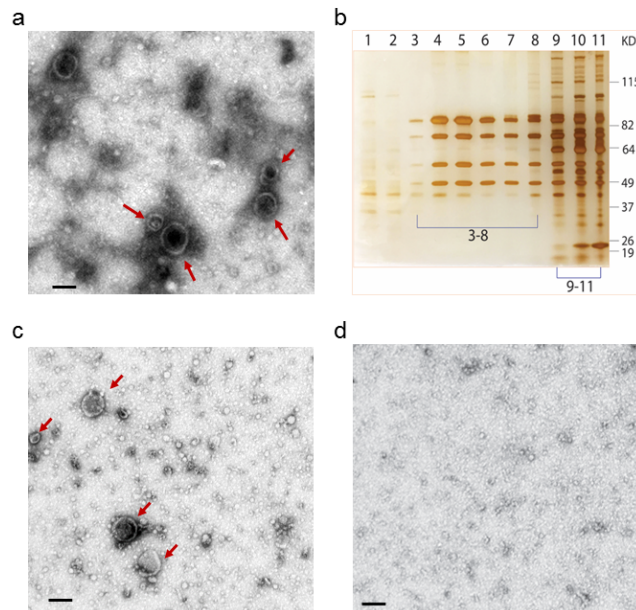

823

824

825 **Fig. 1.** *S. aureus* JE2 produces EVs that can be recovered from culture supernatants after filtration  
826 and concentration to remove molecules <100 kDa. **a)** Crude EVs pelleted by ultracentrifugation  
827 from a JE2 culture supernatant were imaged by TEM. EVs are shown by red arrows. **b)** EVs were  
828 further purified by density gradient ultracentrifugation (Optiprep), and fractions were visualized by  
829 silver-stained SDS-PAGE. **c)** Fractions 3-8 were pooled; OptiPrep was removed by diafiltration,  
830 and the samples were imaged by TEM. **d)** EVs were not visualized in fractions 9-11. Scale bar:  
831 100 nm.

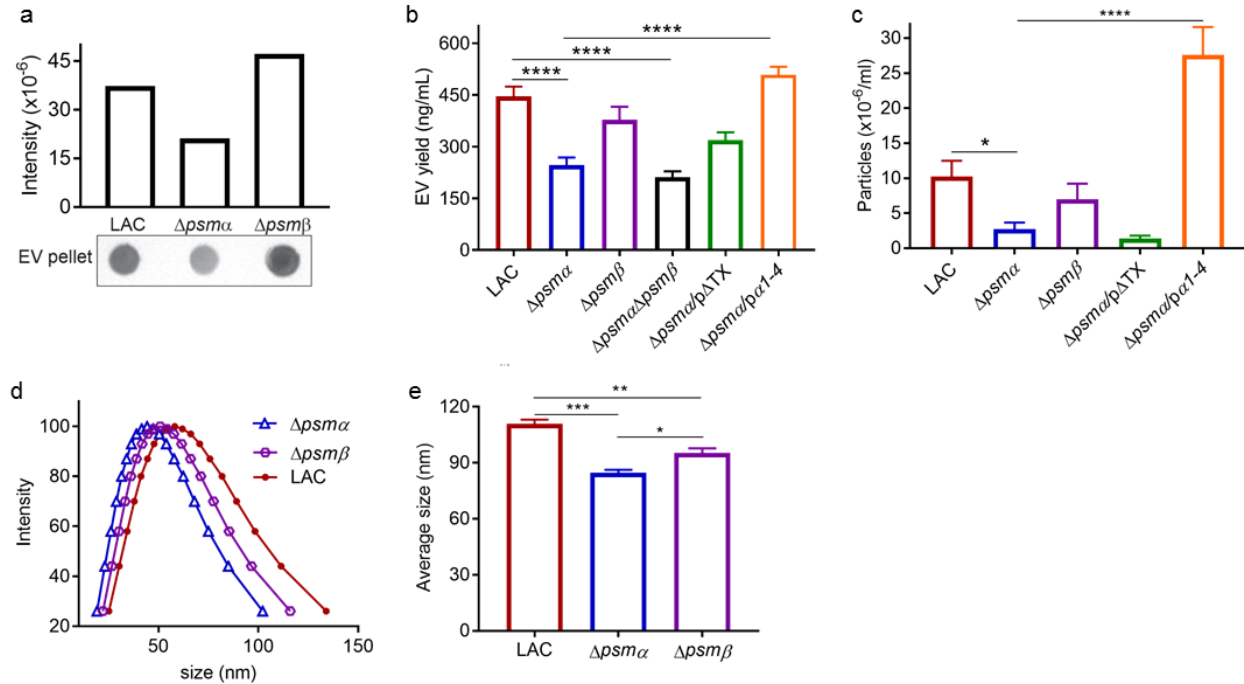

832

833

834 **Fig. 2.** PSMα peptides promote *S. aureus* EV production. **a)** EV production from strain LAC and  
 835 its isogenic  $\Delta psma$  and  $\Delta psmb$  mutants was evaluated by dot-blotting EV suspensions purified  
 836 from the same volume of bacterial culture, **b)** by quantification of total EV protein abundance, or  
 837 **c)** by direct EV quantification of EV particles with nanoparticle tracking analysis. Dot-blotting was  
 838 repeated at least twice, and a representative result is presented. Signal intensity quantified by  
 839 Image Studio Lite software is shown above the blot. EV quantification by other methods was  
 840 calculated from at least three independent experiments and expressed as mean  $\pm$  SEM. **d)** The  
 841 size distribution and **e)** average size of EVs purified from WT and  $\Delta psma$  and  $\Delta psmb$  mutants  
 842 were measured by dynamic light scattering. Data were analyzed using One-way ANOVA with  
 843 Bonferroni's multiple comparison test (Fig. 3b and 3c) or with Tukey's multiple comparison test  
 844 (Fig. 3e). \*  $P < 0.05$ , \*\*  $P < 0.01$ , \*\*\*  $P < 0.001$ , \*\*\*\*  $P < 0.0001$ .

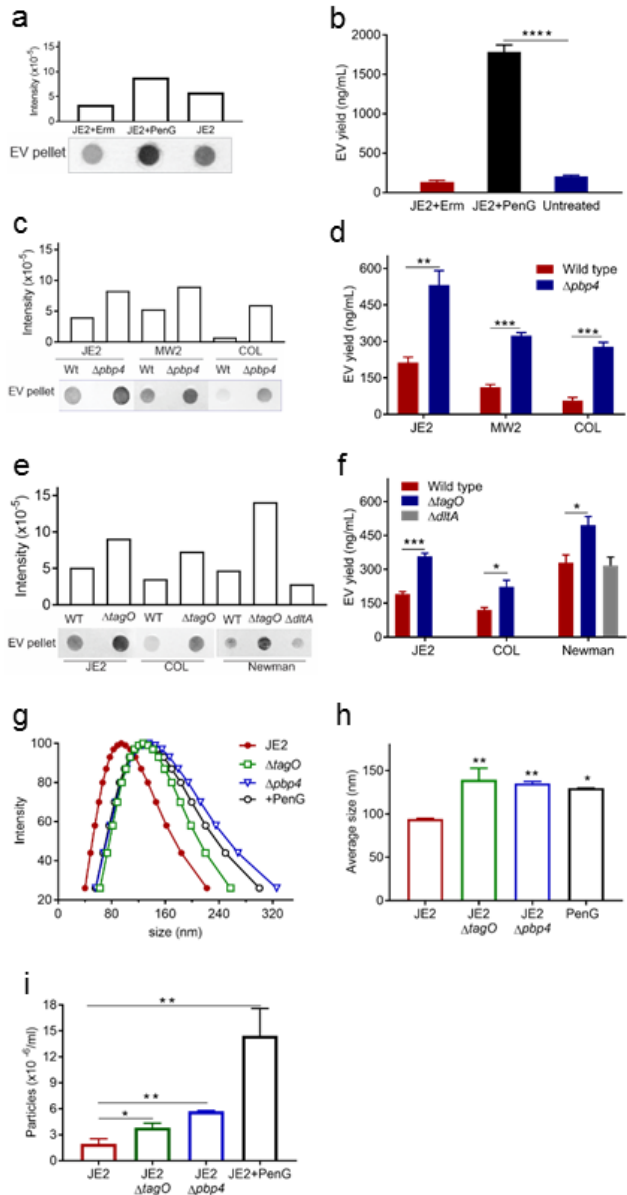

845

846

847 **Fig. 3.** Reductions in PGN crosslinking and lack of WTA increased the production and size of

848 *S. aureus* EVs. **a)** Dot blots were performed on JE2 EVs treated with subinhibitory concentrations

849 of PenG or Em and probed with mouse EV antiserum. **b)** EV protein abundance was quantified

850 and expressed as nanograms EV protein per ml culture. **c)** EV production from *S. aureus* strains

851 JE2, MW2, COL, or their isogenic  $\Delta bbp4$  mutants was evaluated by dot-blotting EV suspensions

852 or **d)** by quantification of total EV protein yield. **e)** EV production from strains JE2, COL, Newman,

853 and their  $\Delta tagO$  and  $\Delta dltA$  mutants was evaluated by dot-blotting EV suspensions or **f)** by

854 quantification of total protein yield. **g**) The size distribution and **h**) average size of EVs isolated  
855 from JE2, PenG treated JE2, and  $\Delta pbp4$  and  $\Delta tagO$  mutants were measured by dynamic light  
856 scattering. **i**) EV particles from JE2, PenG treated JE2, and  $\Delta pbp4$  and  $\Delta tagO$  mutants were  
857 quantified by nanoparticle tracking analysis. The dot immunoblot assay was repeated at least  
858 twice with similar results; a representative blot is shown. EV protein yield and EV particle  
859 quantification experiments were calculated from at least three independent experiments and  
860 expressed as mean  $\pm$  SEM. The data were analyzed using one-way ANOVA with Dunnett's  
861 multiple comparison test (Fig. 3b, 3h, and 3i) or using Student's t-test (Fig. 3d and 3f). \*  $P < 0.05$ ,  
862 \*\*  $P < 0.01$ , \*\*\*  $P < 0.001$ , \*\*\*\*  $P < 0.0001$ .

863

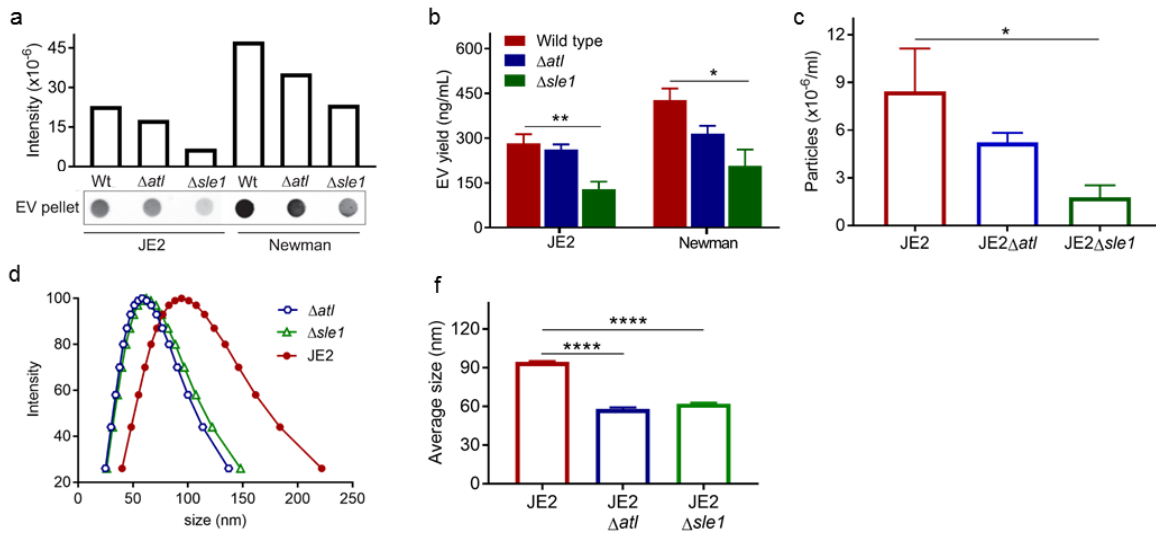

864

865

866 **Fig 4.** The autolysin Sle1, but not Atl, promoted EV biogenesis. **a)** EV production from JE2 and  
867  $\Delta atl$  and  $\Delta sle1$  mutants was evaluated by dot-blotting EV suspensions from filter-sterilized culture  
868 filtrates, **b)** by quantification of total EV protein abundance, or **c)** by EV quantification using  
869 nanoparticle tracking analysis. **d)** The size distribution and **e)** average size of EVs isolated from  
870 JE2 and the  $\Delta atl$  and  $\Delta sle1$  mutants were measured by dynamic light scattering. The dot  
871 immunoblot assay was repeated at least twice with similar results; a representative blot is shown.  
872 EV protein yield and EV particle quantification experiments were calculated from at least three  
873 independent experiments and expressed as mean  $\pm$  SEM. The data were analyzed using one-  
874 way ANOVA with Dunnett's multiple comparison test (Fig. 4b, 4c, and 4e), For all panels, \*  $P < 0.05$ ,  
875 \*\*  $P < 0.01$ , \*\*\*  $P < 0.001$ , \*\*\*\*  $P < 0.0001$ .

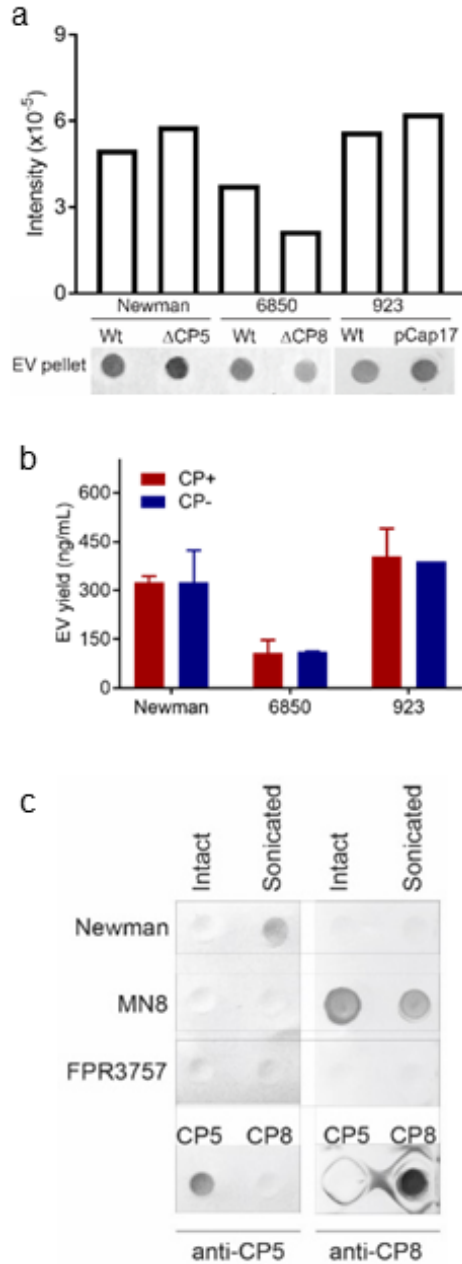

876

877

878 **Fig. 5.** *S. aureus* CP is associated with EVs but does not impact EVs biogenesis. **a)** EV production

879 from encapsulated *S. aureus* (Newman, 6850, 923 [pCP5]) or their CP-negative counterparts

880 (Newman $\Delta$ cap50, 6850 $\Delta$ capHIJK, and 923) was evaluated by dot-blotting EV suspensions or **b)**

881 by quantification of total EV protein yield. **c)** CP5 or CP8 was detected in intact or sonicated EVs

882 (35  $\mu$ g) from strains Newman, MN8, or FPR3757 by immunoblots probed with 1.2  $\mu$ g/ml CP5-

883 specific mAb 4C2 or CP8-specific mAb 5A6. Controls included purified CP5 (15  $\mu$ g) and CP8 (15



884  $\mu\text{g}$ ). The dot immunoblot assay was repeated at least twice with similar results; a representative  
885 blot is shown. EV protein yield were calculated from at least three independent experiments and  
886 expressed as mean  $\pm$  SEM.

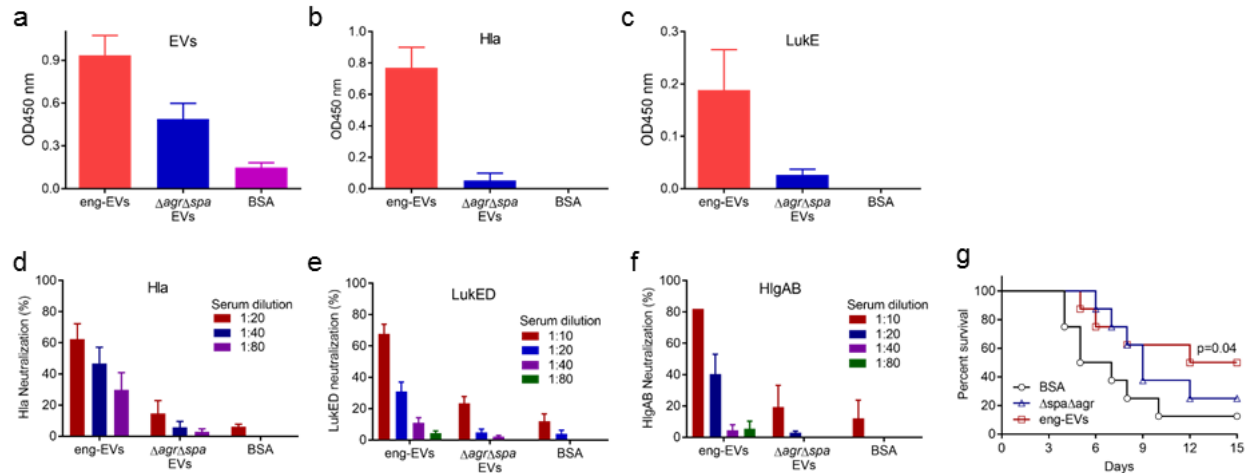

887

888

889 **Fig. 6.** Immunogenicity and protective efficacy in mice of eng-EVs. Antibody levels in sera (diluted  
890 1:100) from mice immunized with eng-EVs were analyzed on ELISA plates coated with **a)** JE2  
891 sonicated EVs, **b)** Hla, or **c)** LukE. Data were expressed as mean  $\pm$  SEM. The neutralizing activity  
892 of sera from mice immunized with BSA or different EV preparations was determined by either  
893 incubating serial dilutions of sera with **d)** Hla, **e)** LukED, or **f)** or HlgAB for 1 h at 37°C before  
894 adding target cells. Control cells were incubated with toxins but no sera. Data are expressed as  
895 percent neutralization  $\pm$  SEM. Mice (n=8) immunized with different JE2 EV preparations were  
896 challenged IV with  $2 \times 10^8$  CFU *S. aureus* NRS685 (**g)**. Survival (comparing EV-immunized mice  
897 vs. BSA immunized mice) was analyzed with the log rank test.

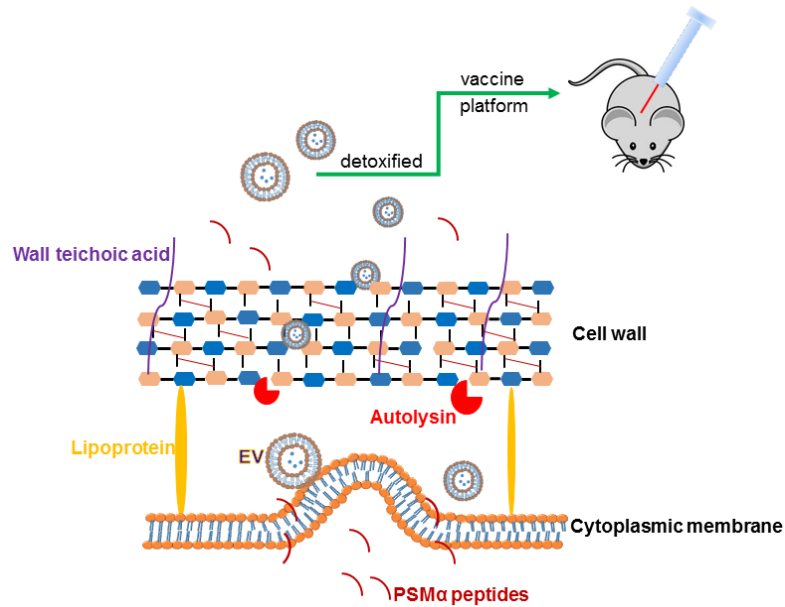

898

899

900 **Fig. 7.** Proposed mechanisms underlying extracellular vesicle (EV) production by *S. aureus*.

901 EVs are generated from the cytoplasmic membrane, and this process is promoted by *S. aureus*

902 PSM $\alpha$  peptides, which have surfactant-like activity, causing membrane disruption. Membrane-

903 derived EVs must also traverse the highly cross-linked *S. aureus* peptidoglycan barrier, and the

904 extent of cell wall cross-linking modulates the efficiency of EV production. Autolysins, such as

905 Sle1, facilitate EV release by hydrolyzing peptidoglycan, particularly at sites of active cell

906 division. We mutated *S. aureus* to render its EVs nontoxic, and then genetically engineered the

907 mutants to package detoxified antigens in EVs. These recombinant EVs were immunogenic in

908 mice and enhanced protective efficacy in a sepsis model of infection.

909

910 **Supplemental Figures**

911

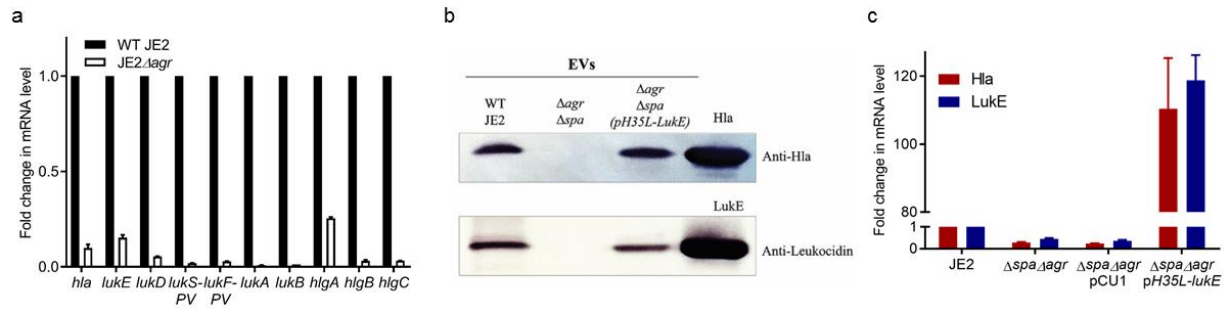

912

913

914 **Figure S1.** EVs from strain JE2 $\Delta$ agr $\Delta$ spa (pHla<sub>H35L</sub>-LukE) package recombinant Hla<sub>H35L</sub> and LukE.

915 **a)** Real time RT-PCR analysis revealed that the mRNA levels of *hla* and genes encoding the

916 leukocidin subunits were dramatically reduced in an *agr* mutant compared to the WT strain JE2.

917 Data are expressed as mean  $\pm$  SEM relative to the WT strain, and each strain was tested in three

918 replicates. **b)** Purified EVs were subjected to SDS-PAGE. Western blot analysis revealed that

919 Hla<sub>H35L</sub> and LukE were detected in EVs from recombinant strain JE2 $\Delta$ agr $\Delta$ spa (pHla<sub>H35L</sub>-LukE) but

920 not in EVs prepared from JE2 $\Delta$ agr $\Delta$ spa. **c)** Real time RT-PCR analysis revealed that the

921 expression of *hla*<sub>H35L</sub> and *lukE* was enhanced  $\sim$ 100-fold in JE2 $\Delta$ agr $\Delta$ spa (pH35L-LukE) compared

922 to the parental strain JE2. Data are expressed as mean  $\pm$  SEM, and each group was tested in

923 three replicates.

924

925

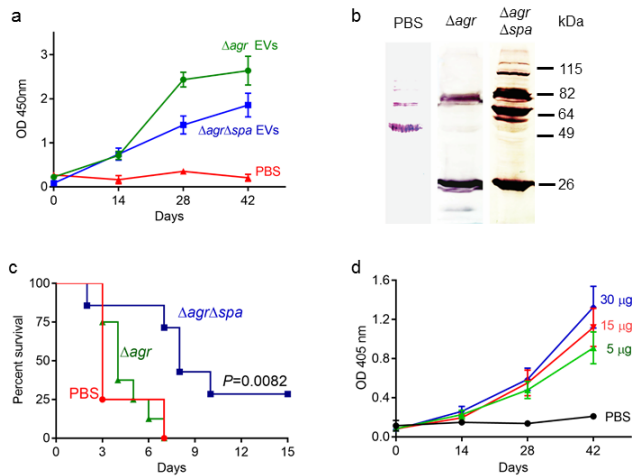

926

927

928 **Figure S2.** Evaluation of the protective efficacy of *S. aureus* EVs. **a)** Antibody levels in sera  
929 (diluted 1:100) from mice immunized with different EVs were analyzed on ELISA plates coated  
930 with sonicated JE2 EVs. **b)** USA300 strain FPR3757 cell lysates were subjected to SDS-PAGE.  
931 Western blot analysis was performed with sera from mice immunized with different EV  
932 preparations. **c)** EV-immunized mice ( $n=8$ ) were challenged IV with  $2 \times 10^8$  CFU strain FPR3757.  
933 Mice immunized with EVs were compared to mice given PBS, and survival was analyzed with the  
934 log rank test. **d)** Antibody levels in sera (diluted 1:100) from mice immunized with different doses  
935 of EVs with alum were analyzed on ELISA plates coated with sonicated JE2 EVs.

936

937

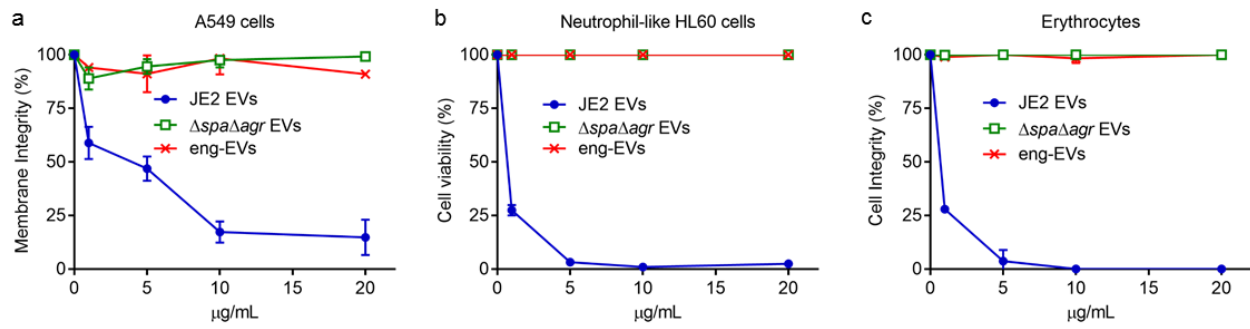

938

939

940 **Figure S3.** Cytotoxicity of *S. aureus* EVs. **a)** Human lung A549 lung epithelial cells, **b)** neutrophil-  
941 like HL60 cells, and **c)** rabbit erythrocytes were treated with different concentration of EVs  
942 produced by WT JE2, JE2 $\Delta agr\Delta spa$ , and eng-EVs.
